# Supplementary material
Source: publisher figshare collection journal article supplement (https://gsajournals.figshare.com/ndownloader/files/32118734)
Supplement: Supplementary file 1 [file 32118734]

## Sheet: Table S7b
The blood cis-mQTLs tested in 74 pediatric healthy controls
SNP	gene	beta	t-stat	p-value
rs10796127	cg26708920	0.36	43.71	2.68e-48
rs9418691	cg06406458	-0.34	-27.64	1.43e-36
rs807019	cg02932204	0.27	31.51	7.22e-40
rs76805118	cg23771949	-0.2	-22.5	1.58e-31
rs3923974	cg23771949	-0.2	-23.2	2.89e-32
rs7098749	cg23771949	-0.2	-23.2	2.89e-32
rs7087640	cg01780345	0.25	24.13	3.24e-33
rs11812218	cg20673407	-0.41	-24.33	2.02e-33
rs1330865	cg01780345	0.26	23.24	2.62e-32
rs4746915	cg17477052	0.13	19.47	4.18e-28
rs4746916	cg17477052	0.13	19.47	4.18e-28
rs10882763	cg00905457	-0.38	-28.86	1.19e-37
rs12766391	cg09533556	0.2	16.53	2.13e-24
rs8181376	cg26708920	0.37	23.34	2.1e-32
rs7080527	cg17477052	0.13	18.13	1.81e-26
rs55712186	cg23771949	-0.18	-17.27	2.24e-25
rs12217895	cg05119883	0.24	22.63	1.15e-31
rs61331747	cg05119883	0.24	22.63	1.15e-31
rs10887024	cg07444487	0.19	18.28	1.16e-26
rs7895680	cg01780345	0.25	24.13	3.24e-33
rs1249348	cg09294573	0.25	17.74	5.59e-26
rs915209	cg09294573	0.24	17.61	8.35e-26
rs1273097	cg09294573	0.24	17.61	8.35e-26
rs1148179	cg09294573	0.24	17.61	8.35e-26
rs1148178	cg09294573	0.24	17.61	8.35e-26
rs56678407	cg23771949	-0.2	-23.2	2.89e-32
rs10995271	cg09533556	0.2	17.26	2.32e-25
rs1148181	cg09294573	0.24	17.61	8.35e-26
rs10822050	cg09533556	0.2	16.09	8.23e-24
rs9418691	cg19572051	-0.21	-24.44	1.56e-33
rs1148180	cg09294573	0.24	17.61	8.35e-26
rs10786791	cg01780345	0.25	24.09	3.55e-33
rs11008222	cg20673407	-0.4	-22.62	1.19e-31
rs10870273	cg16106427	0.28	19.08	1.24e-27
rs138012443	cg09533556	0.2	15.94	1.31e-23
rs10826864	cg20673407	-0.41	-21.08	5.74e-30
rs2864011	cg01780345	0.25	24.13	3.24e-33
rs7090409	cg23771949	-0.2	-22.39	2.11e-31
rs11812238	cg20673407	-0.39	-20.4	3.42e-29
rs4880351	cg16106427	0.29	20.25	5.05e-29
rs11816061	cg14418922	-0.2	-20.71	1.49e-29
rs34449737	cg14418922	-0.2	-20.71	1.49e-29
rs11008223	cg20673407	-0.42	-18.82	2.54e-27
rs200753700	cg09533556	0.2	17.26	2.32e-25
rs10884000	cg01780345	0.25	20.16	6.39e-29
rs2379235	cg16106427	0.28	19.08	1.24e-27
rs1148182	cg09294573	0.25	13.45	4.72e-20
rs10870273	cg01458105	0.26	15.04	2.35e-22
rs11812207	cg20673407	-0.42	-18.82	2.54e-27
rs55978514	cg05119883	0.24	22.63	1.15e-31
rs2807742	cg11671940	0.22	18.61	4.54e-27
rs4880351	cg01458105	0.27	17.32	1.95e-25
rs12768910	cg20673407	-0.37	-17.2	2.77e-25
rs4880351	cg25969878	0.14	18.95	1.76e-27
rs4880353	cg16106427	0.28	19.08	1.24e-27
rs9664407	cg25969878	0.14	20.68	1.61e-29
rs9664407	cg16106427	0.28	20.17	6.3e-29
rs9645570	cg01780345	0.25	20.37	3.72e-29
rs10870273	cg25969878	0.14	16.79	9.65e-25
rs1148177	cg09294573	0.24	17.61	8.35e-26
rs4929820	cg24443494	0.21	21.86	7.91e-31
rs2379235	cg01458105	0.26	15.04	2.35e-22
rs11193149	cg24795173	0.27	16.37	3.48e-24
rs11193150	cg24795173	0.27	16.37	3.48e-24
rs11193153	cg24795173	0.27	16.37	3.48e-24
rs9664407	cg01458105	0.27	19.69	2.28e-28
rs1249347	cg09294573	0.23	14.17	4.11e-21
rs2447629	cg09294573	0.23	14.17	4.11e-21
rs10870273	cg19754622	0.25	14.22	3.55e-21
rs2379235	cg25969878	0.14	16.79	9.65e-25
rs7097132	cg20673407	-0.37	-15.55	4.46e-23
rs7097925	cg01780345	-0.25	-20.37	3.72e-29
rs7901480	cg17371064	-0.23	-15.27	1.11e-22
rs615172	cg13473803	-0.16	-19.67	2.39e-28
rs4880353	cg01458105	0.26	15.04	2.35e-22
rs1148185	cg09294573	0.23	14.17	4.11e-21
rs3936165	cg24443494	0.21	18.58	4.99e-27
rs7082919	cg01780345	0.25	17.59	8.61e-26
rs1148183	cg09294573	0.23	14.17	4.11e-21
rs11200264	cg07444487	0.18	14.63	8.85e-22
rs4880353	cg25969878	0.14	16.79	9.65e-25
rs7901618	cg17371064	-0.23	-15.27	1.11e-22
rs10795035	cg17371064	-0.23	-15.27	1.11e-22
rs12247234	cg24795173	0.27	16.37	3.48e-24
rs12268682	cg24795173	0.26	16.24	5.2e-24
rs7094595	cg09533556	0.18	12.03	7.39e-18
rs12266740	cg24795173	0.26	14.81	4.89e-22
rs12245102	cg24795173	0.26	14.81	4.89e-22
rs7905030	cg09533556	0.18	12.03	7.39e-18
rs7090073	cg09533556	0.18	12.03	7.39e-18
rs10995258	cg09533556	0.17	11.62	3.26e-17
rs7901595	cg24443494	0.2	17.38	1.63e-25
rs4880352	cg01458105	0.25	13.49	4.17e-20
rs2379235	cg19754622	0.25	14.22	3.55e-21
rs10995255	cg09533556	0.17	11.62	3.26e-17
rs10995256	cg09533556	0.17	11.62	3.26e-17
rs12768538	cg09533556	0.17	11.62	3.26e-17
rs1148186	cg09294573	0.23	14.17	4.11e-21
rs4880351	cg19754622	0.25	15.22	1.3e-22
rs4880353	cg19754622	0.25	14.22	3.55e-21
rs1763406	cg07158320	-0.25	-16.38	3.32e-24
rs2783613	cg07158320	-0.25	-16.38	3.32e-24
rs2783612	cg07158320	-0.25	-16.38	3.32e-24
rs10795040	cg17371064	-0.23	-15.27	1.11e-22
rs10904033	cg17371064	-0.23	-15.27	1.11e-22
rs4147144	cg17371064	-0.23	-15.27	1.11e-22
rs2783611	cg07158320	-0.25	-16.56	1.93e-24
rs7900144	cg25423573	0.13	10.42	2.99e-15
rs813081	cg09294573	0.23	14.97	2.98e-22
rs10995260	cg09533556	0.17	11.62	3.26e-17
rs11193152	cg24795173	0.26	12.96	2.64e-19
rs12268817	cg24795173	0.27	16.37	3.48e-24
rs11146339	cg23771949	-0.2	-22.61	1.22e-31
rs11002957	cg25423573	0.13	10.42	2.99e-15
rs10857489	cg02562448	0.13	17.52	1.08e-25
rs6480936	cg25423573	0.13	10.42	2.99e-15
rs4929793	cg24443494	0.21	19.48	4.06e-28
rs7915508	cg24443494	0.21	19.48	4.06e-28
rs28612146	cg24443494	0.21	19.48	4.06e-28
rs672785	cg24877975	0.17	13.51	3.96e-20
rs10824749	cg25423573	0.12	10.01	1.45e-14
rs2475433	cg13473803	-0.16	-14.05	6.14e-21
rs7095264	cg24795173	0.27	17.06	4.27e-25
rs4929794	cg24443494	0.21	18.83	2.47e-27
rs584353	cg24877975	0.17	13.17	1.26e-19
rs630051	cg24877975	0.17	13.13	1.45e-19
rs666429	cg24877975	0.17	13.39	5.91e-20
rs1903890	cg24877975	0.17	13.37	6.31e-20
rs2616637	cg24877975	0.17	13.39	5.91e-20
rs2770202	cg14240646	0.26	13.35	6.87e-20
rs10995242	cg09533556	0.17	11.83	1.53e-17
rs10995243	cg09533556	0.17	12.35	2.3e-18
rs10995246	cg09533556	0.17	12.35	2.3e-18
rs149499422	cg02562448	0.13	15.5	5.35e-23
rs140733555	cg02562448	0.13	15.5	5.35e-23
rs10995249	cg09533556	0.17	12.35	2.3e-18
rs10995250	cg09533556	0.17	12.35	2.3e-18
rs1977292	cg02562448	0.13	15.5	5.35e-23
rs138963527	cg02562448	0.13	15.5	5.35e-23
rs56237213	cg02562448	0.13	15.5	5.35e-23
rs1946391	cg14812524	0.15	14.98	2.83e-22
rs7092993	cg17371064	-0.23	-12.95	2.71e-19
rs10995251	cg09533556	0.17	12.67	7.33e-19
rs10995241	cg09533556	0.17	11.83	1.53e-17
rs10995248	cg09533556	0.17	12.35	2.3e-18
rs16917546	cg09533556	0.17	12.35	2.3e-18
rs2807740	cg11671940	0.22	16.76	1.05e-24
rs28379249	cg24443494	0.21	16.9	6.88e-25
rs557264	cg27001894	-0.14	-12.9	3.25e-19
rs10995238	cg09533556	0.17	11.83	1.53e-17
rs7474813	cg09533556	0.17	11.83	1.53e-17
rs606682	cg24877975	0.17	14.77	5.64e-22
rs2616636	cg24877975	0.17	12.49	1.4e-18
rs945797	cg17371064	-0.22	-13.29	8.4e-20
rs7920264	cg01458105	0.27	18.86	2.29e-27
rs2807738	cg11671940	0.22	16.76	1.05e-24
rs7076074	cg24443494	0.21	16.9	6.88e-25
rs5030904	cg14418922	-0.21	-17.31	1.98e-25
rs1077203	cg02562448	0.13	13.68	2.17e-20
rs10995239	cg09533556	0.17	11.83	1.53e-17
rs4360590	cg09533556	0.17	11.83	1.53e-17
rs2780672	cg14240646	0.26	13.35	6.87e-20
rs2800392	cg14240646	0.26	13.35	6.87e-20
rs11193151	cg24795173	0.25	13.22	1.06e-19
rs2040038;rs201820012	cg14240646	0.26	13.35	6.87e-20
rs1148167	cg14240646	0.26	12.44	1.7e-18
rs1144511	cg14240646	0.26	12.42	1.78e-18
rs7905456	cg20673407	-0.42	-15.46	5.97e-23
rs2447633	cg24877975	0.17	13.28	8.51e-20
rs998334	cg24877975	0.17	13.28	8.51e-20
rs4838515	cg02562448	0.13	17.89	3.61e-26
rs10857487	cg02562448	0.13	17.71	6.08e-26
rs11596444	cg02562448	0.13	17.71	6.08e-26
rs10857488	cg02562448	0.13	17.71	6.08e-26
rs4838389	cg02562448	0.13	17.71	6.08e-26
rs57276577	cg02562448	0.13	17.71	6.08e-26
rs10829212	cg14240646	0.26	13.35	6.87e-20
rs2780674	cg14240646	0.26	11.71	2.35e-17
rs9664407	cg19754622	0.25	15.75	2.39e-23
rs9418773	cg06406458	-0.34	-16.05	9.34e-24
rs9418694	cg06406458	-0.34	-16.05	9.34e-24
rs9418779	cg06406458	-0.34	-16.05	9.34e-24
rs9418787	cg06406458	-0.34	-16.05	9.34e-24
rs660101	cg24877975	0.17	14.28	2.85e-21
rs2762609	cg13562929	-0.16	-17.1	3.71e-25
rs10904493	cg13661397	-0.15	-13.35	6.71e-20
rs4929792	cg24443494	0.21	14.86	4.17e-22
rs10776570	cg02562448	0.13	13.87	1.13e-20
rs10776571	cg02562448	0.13	13.87	1.13e-20
rs10795275	cg13661397	-0.15	-12.92	3e-19
rs9418776	cg06406458	-0.33	-15.2	1.4e-22
rs2807737	cg11671940	0.22	16.76	1.05e-24
rs2767702	cg13562929	-0.16	-17.1	3.71e-25
rs2692771	cg13562929	-0.16	-17.1	3.71e-25
rs730429	cg02562448	0.13	16.08	8.58e-24
rs4934390	cg14812524	0.15	14.22	3.54e-21
rs1048956	cg14812524	0.15	13.67	2.22e-20
rs7894267	cg02562448	0.13	15.5	5.35e-23
rs7905145	cg02562448	0.13	15.5	5.35e-23
rs10857490	cg02562448	0.13	15.5	5.35e-23
rs11593606	cg02562448	0.13	15.5	5.35e-23
rs34457321	cg02562448	0.13	15.5	5.35e-23
rs10857491	cg02562448	0.13	15.5	5.35e-23
rs145132135	cg02562448	0.13	15.5	5.35e-23
rs145885637	cg02562448	0.13	15.5	5.35e-23
rs138228590	cg02562448	0.13	15.5	5.35e-23
rs12359850	cg02562448	0.13	15.5	5.35e-23
rs373676979	cg02562448	0.13	15.5	5.35e-23
rs375651602	cg02562448	0.13	15.5	5.35e-23
rs11814028	cg14418922	-0.21	-17.31	1.98e-25
rs11817844	cg14418922	-0.21	-17.31	1.98e-25
rs11814066	cg14418922	-0.21	-17.31	1.98e-25
rs9423584	cg08977827	-0.18	-14.17	4.18e-21
rs4934391	cg14812524	0.15	14.86	4.19e-22
rs6585266	cg24877975	0.16	12.3	2.74e-18
rs17558323	cg14418922	-0.21	-16.41	3.1e-24
rs1763405	cg07158320	-0.26	-17.03	4.57e-25
rs10824750	cg25423573	0.12	10.06	1.17e-14
rs77555177	cg07570687	0.15	14.91	3.58e-22
rs1418181	cg07158320	-0.26	-16.7	1.27e-24
rs1773869	cg07158320	-0.26	-16.7	1.27e-24
rs2783428	cg07158320	-0.26	-16.7	1.27e-24
rs7911653	cg14418922	-0.2	-12.44	1.69e-18
rs4881446	cg13661397	-0.15	-11.4	7.35e-17
rs2210963	cg17371064	-0.2	-10.19	7.3e-15
rs9418773	cg19572051	-0.2	-14.6	9.84e-22
rs9418694	cg19572051	-0.2	-14.6	9.84e-22
rs9418779	cg19572051	-0.2	-14.6	9.84e-22
rs9418787	cg19572051	-0.2	-14.6	9.84e-22
rs10883496	cg07570687	0.15	14.91	3.58e-22
rs3793772	cg07570687	0.15	14.91	3.58e-22
rs11190570	cg07570687	0.15	14.91	3.58e-22
rs10883497	cg07570687	0.15	14.91	3.58e-22
rs11190572	cg07570687	0.15	14.91	3.58e-22
rs11190573	cg07570687	0.15	14.91	3.58e-22
rs11190575	cg07570687	0.15	14.91	3.58e-22
rs79831012	cg07570687	0.15	14.91	3.58e-22
rs139301740;rs10883500;rs386747024	cg07570687	0.15	14.91	3.58e-22
rs10883501	cg07570687	0.15	14.91	3.58e-22
rs10883502	cg07570687	0.15	14.91	3.58e-22
rs11190581	cg07570687	0.15	14.91	3.58e-22
rs1572538	cg17371064	-0.21	-12.43	1.72e-18
rs9418789	cg06406458	-0.34	-16.05	9.34e-24
rs7920264	cg25969878	0.14	17.52	1.09e-25
rs11815117	cg14418922	-0.2	-13.33	7.28e-20
rs34046436	cg14418922	-0.2	-13.33	7.28e-20
rs2420936	cg07044115	-0.27	-15.66	3.16e-23
rs9418776	cg19572051	-0.2	-13.92	9.53e-21
rs9418761	cg06406458	-0.33	-15.32	9.59e-23
rs9418706	cg06406458	-0.34	-16.05	9.34e-24
rs55896038	cg07044115	-0.27	-15.66	3.16e-23
rs7091556	cg07044115	-0.27	-15.66	3.16e-23
rs11815086	cg14418922	-0.2	-13.33	7.28e-20
rs7920538	cg24795173	0.26	16.24	5.2e-24
rs34179582	cg14418922	-0.2	-12.05	6.94e-18
rs35295735	cg14418922	-0.2	-12.05	6.94e-18
rs1426616	cg14812524	0.15	14.3	2.68e-21
rs4285777	cg14418922	-0.2	-11.6	3.53e-17
rs4370823	cg14418922	-0.2	-11.6	3.53e-17
rs12780930	cg14418922	-0.2	-11.6	3.53e-17
rs11190560;rs745641123	cg07570687	0.15	13.93	9.39e-21
rs4919464	cg07570687	0.15	14.37	2.1e-21
rs4919465	cg07570687	0.15	14.37	2.1e-21
rs11190571	cg07570687	0.15	14.37	2.1e-21
rs10883499	cg07570687	0.15	14.37	2.1e-21
rs11190578	cg07570687	0.15	14.37	2.1e-21
rs2295770	cg07570687	0.15	14.37	2.1e-21
rs12355721	cg07570687	0.15	14.37	2.1e-21
rs75063298	cg07570687	0.15	14.37	2.1e-21
rs12219789	cg07570687	0.15	14.37	2.1e-21
rs11190562	cg07570687	0.15	14.37	2.1e-21
rs11190563	cg07570687	0.15	14.37	2.1e-21
rs7920870	cg07570687	0.15	14.37	2.1e-21
rs12358461	cg07570687	0.15	14.37	2.1e-21
rs57025426	cg07570687	0.15	14.21	3.61e-21
rs11190552	cg07570687	0.15	14.21	3.61e-21
rs11190553	cg07570687	0.15	14.21	3.61e-21
rs1106565	cg07570687	0.15	14.21	3.61e-21
rs7919256	cg14418922	-0.2	-11.6	3.53e-17
rs17558246	cg14418922	-0.19	-13.08	1.73e-19
rs2420936	cg08899523	0.23	13.72	1.9e-20
rs3923348	cg13661397	-0.16	-11.54	4.42e-17
rs4881438	cg13661397	-0.16	-11.54	4.42e-17
rs4418709	cg13661397	-0.16	-11.54	4.42e-17
rs55896038	cg08899523	0.23	13.72	1.9e-20
rs7091556	cg08899523	0.23	13.72	1.9e-20
rs3793771	cg07570687	0.15	14.78	5.45e-22
rs7920264	cg16106427	0.28	17.71	6.11e-26
rs17184356	cg09553982	-0.18	-11.72	2.28e-17
rs11817899	cg14418922	-0.2	-13.06	1.85e-19
rs2420936	cg06791446	-0.2	-16.08	8.47e-24
rs2485639	cg27555617	-0.06	-17.62	7.9e-26
rs2492775	cg27555617	-0.06	-17.62	7.9e-26
rs2485640	cg27555617	-0.06	-17.62	7.9e-26
rs2493897	cg27555617	-0.06	-17.62	7.9e-26
rs2819725	cg27555617	-0.06	-17.62	7.9e-26
rs17444839	cg09553982	-0.18	-13.1	1.62e-19
rs7081063	cg07570687	0.15	13.91	9.87e-21
rs7081003	cg07570687	0.15	13.91	9.87e-21
rs7080884	cg07570687	0.15	13.91	9.87e-21
rs2003284	cg07570687	0.15	13.91	9.87e-21
rs11190540	cg07570687	0.15	13.91	9.87e-21
rs11190541	cg07570687	0.15	13.91	9.87e-21
rs3936165	cg13563815	0.16	13.34	6.95e-20
rs10883498	cg07570687	0.15	14.91	3.58e-22
rs7900678	cg07570687	0.15	14.91	3.58e-22
rs55896038	cg06791446	-0.2	-16.08	8.47e-24
rs7091556	cg06791446	-0.2	-16.08	8.47e-24
rs4918278	cg24795173	0.26	16.24	5.2e-24
rs4586052	cg13661397	-0.16	-11.54	4.42e-17
rs6601967	cg13661397	-0.16	-11.54	4.42e-17
rs2814455	cg27555617	-0.06	-17.62	7.9e-26
rs2814457	cg27555617	-0.06	-17.62	7.9e-26
rs2786904	cg27555617	-0.06	-17.62	7.9e-26
rs4881165	cg17371064	-0.2	-10.93	4.38e-16
rs12098745	cg09553982	-0.18	-13.1	1.62e-19
rs11001622	cg09553982	-0.18	-13.1	1.62e-19
rs11101131;rs67790405	cg02562448	0.13	15.23	1.24e-22
rs2485633	cg27555617	-0.06	-18.18	1.58e-26
rs2485634	cg27555617	-0.06	-18.18	1.58e-26
rs9418789	cg19572051	-0.2	-14.6	9.84e-22
rs78824931	cg06406458	-0.34	-14.9	3.66e-22
rs7924137	cg11198398	0.15	11.59	3.67e-17
rs10904031	cg17371064	-0.2	-10.93	4.38e-16
rs10751926	cg17371064	-0.2	-10.93	4.38e-16
rs10751927	cg17371064	-0.2	-10.93	4.38e-16
rs6584379	cg07570687	0.15	14.37	2.1e-21
rs4929820	cg13563815	0.16	14.14	4.53e-21
rs2420936	cg25052156	-0.2	-16.28	4.62e-24
rs2819713	cg27555617	-0.06	-17.62	7.9e-26
rs827310	cg13398715	-0.11	-9.84	2.74e-14
rs9418761	cg19572051	-0.2	-13.88	1.1e-20
rs2819719	cg27555617	-0.06	-17.62	7.9e-26
rs2814450	cg27555617	-0.06	-17.62	7.9e-26
rs2819717	cg27555617	-0.06	-17.62	7.9e-26
rs2814451	cg27555617	-0.06	-17.62	7.9e-26
rs2814452	cg27555617	-0.06	-17.62	7.9e-26
rs2819716	cg27555617	-0.06	-17.62	7.9e-26
rs2819712	cg27555617	-0.06	-17.62	7.9e-26
rs2819710	cg27555617	-0.06	-17.62	7.9e-26
rs2819709	cg27555617	-0.06	-17.62	7.9e-26
rs1105367	cg27555617	-0.06	-17.62	7.9e-26
rs1105366	cg27555617	-0.06	-17.62	7.9e-26
rs2786884	cg27555617	-0.06	-17.62	7.9e-26
rs2814454	cg27555617	-0.06	-17.62	7.9e-26
rs2493899	cg27555617	-0.06	-17.62	7.9e-26
rs2492773	cg27555617	-0.06	-17.62	7.9e-26
rs2492774	cg27555617	-0.06	-17.62	7.9e-26
rs2786903	cg27555617	-0.06	-17.62	7.9e-26
rs35935154	cg14418922	-0.21	-16.41	3.1e-24
rs1250587	cg06073814	0.15	10.18	7.54e-15
rs9418706	cg19572051	-0.2	-14.6	9.84e-22
rs4919462	cg07570687	0.15	14.37	2.1e-21
rs4919463	cg07570687	0.15	14.37	2.1e-21
rs7906394	cg07570687	0.15	14.37	2.1e-21
rs1250584	cg06073814	0.15	10.04	1.26e-14
rs55896038	cg25052156	-0.2	-16.28	4.62e-24
rs7091556	cg25052156	-0.2	-16.28	4.62e-24
rs67338516	cg09553982	-0.18	-11.72	2.28e-17
rs10883492	cg07570687	0.15	14.21	3.61e-21
rs10883493	cg07570687	0.15	14.21	3.61e-21
rs11190555	cg07570687	0.15	14.21	3.61e-21
rs11190556	cg07570687	0.15	14.21	3.61e-21
rs11190557	cg07570687	0.15	14.21	3.61e-21
rs11190558	cg07570687	0.15	14.21	3.61e-21
rs7085261	cg07570687	0.15	14.21	3.61e-21
rs7085439	cg07570687	0.15	14.21	3.61e-21
rs4881450	cg13661397	-0.16	-11.54	4.42e-17
rs1250588	cg06073814	0.15	10.12	9.43e-15
rs7914425	cg06279296	0.22	16.11	7.72e-24
rs7917823	cg06279296	0.22	16.11	7.72e-24
rs7917949	cg06279296	0.22	16.11	7.72e-24
rs7074740	cg06279296	0.22	16.11	7.72e-24
rs11816987	cg14418922	-0.2	-12.44	1.69e-18
rs10745269	cg14436939	-0.16	-14.46	1.6e-21
rs6584773	cg24795173	0.26	13.93	9.16e-21
rs58828402	cg06279296	0.22	15.47	5.87e-23
rs11253163	cg06279296	0.22	15.47	5.87e-23
rs151239879	cg15590007	0.12	11.06	2.64e-16
rs150423942	cg15590007	0.12	11.06	2.64e-16
rs75129876	cg15590007	0.12	11.06	2.64e-16
rs77200598	cg15590007	0.12	11.06	2.64e-16
rs55717607	cg15590007	0.12	11.06	2.64e-16
rs11239491	cg15590007	0.12	11.06	2.64e-16
rs7084793	cg15590007	0.12	11.06	2.64e-16
rs7921503	cg15590007	0.12	11.06	2.64e-16
rs7909740	cg15590007	0.12	11.06	2.64e-16
rs7909768	cg15590007	0.12	11.06	2.64e-16
rs7913488	cg15590007	0.12	11.06	2.64e-16
rs67491417	cg15590007	0.12	11.06	2.64e-16
rs6413416	cg15590007	0.12	11.06	2.64e-16
rs4986832	cg15590007	0.12	11.06	2.64e-16
rs7913948	cg15590007	0.12	11.06	2.64e-16
rs12762303	cg15590007	0.12	11.06	2.64e-16
rs78137087	cg15590007	0.12	11.06	2.64e-16
rs72561472	cg15590007	0.12	11.06	2.64e-16
rs4987106	cg15590007	0.12	11.06	2.64e-16
rs111528152	cg15590007	0.12	11.06	2.64e-16
rs12763738	cg15590007	0.12	11.06	2.64e-16
rs66489870	cg15590007	0.12	11.06	2.64e-16
rs71494775	cg15590007	0.12	11.06	2.64e-16
rs1864414	cg15590007	0.12	11.06	2.64e-16
rs1864413	cg15590007	0.12	11.06	2.64e-16
rs1864412	cg15590007	0.12	11.06	2.64e-16
rs7093951	cg06279296	0.22	15.47	5.87e-23
rs67354918	cg06279296	0.22	15.47	5.87e-23
rs4508132	cg26679884	0.42	12.02	7.54e-18
rs34790195	cg14418922	-0.19	-10.58	1.64e-15
rs12269237	cg26540559	0.07	15.12	1.78e-22
rs10745266	cg14436939	-0.16	-14.46	1.55e-21
rs11257380	cg21322043	0.33	13.25	9.68e-20
rs73581620	cg06279296	0.22	16.11	7.72e-24
rs113210208	cg06279296	0.22	16.11	7.72e-24
rs7912391	cg06279296	0.22	16.11	7.72e-24
rs7910971	cg14418922	-0.2	-13.33	7.28e-20
rs17473271	cg14418922	-0.2	-13.33	7.28e-20
rs12252088	cg06279296	0.22	16.11	7.72e-24
rs12266646	cg06279296	0.22	16.2	5.87e-24
rs58217739	cg06279296	0.22	15.47	5.87e-23
rs7101060	cg14436939	-0.16	-14.46	1.6e-21
rs6537560	cg14436939	-0.16	-14.46	1.6e-21
rs11190551	cg07570687	0.15	13.91	9.87e-21
rs2795092	cg07158320	-0.25	-16.56	1.93e-24
rs17113137	cg07570687	0.15	14.07	5.84e-21
rs10887024	cg13812702	0.12	14.34	2.36e-21
rs10437448	cg14436939	-0.16	-14.38	2.07e-21
rs7086070	cg14436939	-0.16	-14.4	1.93e-21
rs883604	cg14436939	-0.16	-14.4	1.93e-21
rs2420936	cg16653991	0.24	14.95	3.18e-22
rs10218874	cg14436939	-0.16	-14.4	1.93e-21
rs11257377	cg21322043	0.33	13.12	1.49e-19
rs11257378	cg21322043	0.33	13.12	1.49e-19
rs12360492	cg21322043	0.33	13.12	1.49e-19
rs1250582	cg06073814	0.14	9.9	2.18e-14
rs10745270	cg14436939	-0.16	-14.4	1.93e-21
rs11101298	cg14436939	-0.16	-14.4	1.93e-21
rs4838406	cg14436939	-0.16	-14.4	1.93e-21
rs10857560	cg14436939	-0.16	-14.4	1.93e-21
rs6588753	cg24443494	0.2	13.63	2.56e-20
rs55896038	cg16653991	0.24	14.95	3.18e-22
rs7091556	cg16653991	0.24	14.95	3.18e-22
rs4987105	cg15590007	0.12	10.73	9.19e-16
rs11101306	cg14436939	-0.16	-14.3	2.67e-21
rs2018882	cg13562929	-0.16	-17.1	3.71e-25
rs2783429	cg07158320	-0.25	-16.56	1.93e-24
rs4880352	cg25969878	0.12	10.84	6.11e-16
rs11815080	cg14418922	-0.2	-13.33	7.28e-20
rs11817109	cg14418922	-0.2	-13.33	7.28e-20
rs11815118	cg14418922	-0.2	-13.33	7.28e-20
rs17558167	cg14418922	-0.2	-13.33	7.28e-20
rs17558195	cg14418922	-0.2	-13.33	7.28e-20
rs3998843	cg14418922	-0.2	-13.33	7.28e-20
rs1250589	cg06073814	0.15	9.8	3.29e-14
rs17382898	cg19681037	0.15	12.25	3.29e-18
rs12255632	cg06279296	0.22	14.84	4.53e-22
rs10887796	cg14812524	0.14	12.16	4.63e-18
rs4880352	cg19754622	0.23	11.35	8.99e-17
rs2804556	cg07158320	-0.24	-15.83	1.85e-23
rs10883494	cg07570687	0.15	12.77	5.19e-19
rs2493898	cg27555617	-0.06	-17.62	7.9e-26
rs2210964	cg17371064	-0.2	-10.93	4.38e-16
rs10795041	cg17371064	-0.2	-10.93	4.38e-16
rs10795042	cg17371064	-0.2	-10.93	4.38e-16
rs10795043	cg17371064	-0.2	-10.93	4.38e-16
rs10795044	cg17371064	-0.2	-10.93	4.38e-16
rs10904034	cg17371064	-0.2	-10.93	4.38e-16
rs4147143	cg17371064	-0.2	-10.93	4.38e-16
rs10795045	cg17371064	-0.2	-10.93	4.38e-16
rs4881166	cg17371064	-0.2	-10.93	4.38e-16
rs10786772	cg01727419	-0.09	-9.42	1.42e-13
rs6593482	cg15590007	0.12	10.51	2.12e-15
rs67008983	cg15590007	0.12	10.51	2.12e-15
rs55787481	cg15590007	0.12	10.51	2.12e-15
rs12783095	cg15590007	0.12	10.51	2.12e-15
rs17157728	cg15590007	0.12	10.51	2.12e-15
rs17157733	cg15590007	0.12	10.51	2.12e-15
rs56150414	cg15590007	0.12	10.41	3.09e-15
rs7078822	cg15590007	0.12	10.73	9.19e-16
rs7093687	cg15590007	0.12	10.73	9.19e-16
rs7081004	cg15590007	0.12	10.73	9.19e-16
rs2814456	cg27555617	-0.06	-17.62	7.9e-26
rs7897613	cg24795173	0.26	13.93	9.16e-21
rs1984905	cg26679884	0.42	11.84	1.45e-17
rs4880352	cg16106427	0.26	12.76	5.35e-19
rs4495823	cg26679884	0.41	11.74	2.13e-17
rs11257384	cg21322043	0.33	13.25	9.68e-20
rs2492768	cg27555617	-0.06	-18.18	1.58e-26
rs2493896	cg27555617	-0.06	-18.18	1.58e-26
rs2492771	cg27555617	-0.06	-18.18	1.58e-26
rs10857562	cg14436939	-0.16	-14.4	1.93e-21
rs1972949	cg14436939	-0.16	-14.4	1.93e-21
rs7924070	cg14436939	-0.16	-14.4	1.93e-21
rs10508903	cg14436939	-0.16	-14.4	1.93e-21
rs4838590	cg14436939	-0.16	-14.4	1.93e-21
rs9284	cg14436939	-0.16	-14.4	1.93e-21
rs78758365	cg21322043	0.33	13.12	1.49e-19
rs9419541	cg26679884	0.41	11.56	4.12e-17
rs61846313	cg21322043	0.33	13.12	1.49e-19
rs7075976	cg14436939	-0.16	-14.4	1.93e-21
rs12217860	cg14240646	0.25	11.48	5.44e-17
rs10883928	cg01727419	-0.1	-9.37	1.75e-13
rs1250590	cg06073814	0.15	9.41	1.51e-13
rs78824931	cg19572051	-0.2	-13.3	8.15e-20
rs4147145	cg17371064	-0.2	-10.93	4.38e-16
rs4881167	cg17371064	-0.2	-10.93	4.38e-16
rs10903415	cg02305391	0.17	11.54	4.37e-17
rs2082108	cg15590007	0.12	11.06	2.64e-16
rs12354994	cg15590007	0.12	11.06	2.64e-16
rs12354742	cg15590007	0.12	11.06	2.64e-16
rs11517281	cg15590007	0.12	11.06	2.64e-16
rs12359299	cg15590007	0.12	11.06	2.64e-16
rs11523408	cg15590007	0.12	11.06	2.64e-16
rs12359302	cg15590007	0.12	11.25	1.28e-16
rs58898174;rs201202504;rs386748564	cg00809775	0.11	10.7	1.03e-15
rs7093768	cg00809775	0.11	10.7	1.03e-15
rs2885521	cg00809775	0.11	10.7	1.03e-15
rs11245330	cg00809775	0.11	10.7	1.03e-15
rs11245331	cg00809775	0.11	10.7	1.03e-15
rs2420936	cg10379346	-0.25	-13.47	4.44e-20
rs11250382	cg02305391	0.17	12.26	3.14e-18
rs2819721	cg27555617	-0.06	-17.62	7.9e-26
rs2814449	cg27555617	-0.06	-17.62	7.9e-26
rs2819714	cg27555617	-0.06	-17.62	7.9e-26
rs2485637	cg27555617	-0.06	-17.62	7.9e-26
rs2485638	cg27555617	-0.06	-17.62	7.9e-26
rs60928707	cg19681037	0.15	13.58	3.11e-20
rs10509695	cg19681037	0.15	13.58	3.11e-20
rs11245329	cg00809775	0.11	10.7	1.03e-15
rs56180358	cg15590007	0.12	10.73	9.19e-16
rs11188541	cg19681037	0.15	13.63	2.62e-20
rs12780491	cg07889765	-0.17	-13.71	1.98e-20
rs4748064	cg07629776	0.19	14.87	4.04e-22
rs10776598	cg14436939	-0.16	-14.4	1.93e-21
rs4962681	cg00809775	0.11	10.7	1.03e-15
rs9419459	cg26679884	0.41	11.65	2.98e-17
rs55965812	cg15590007	0.12	10.73	9.19e-16
rs12354712	cg15590007	0.12	10.73	9.19e-16
rs55896038	cg10379346	-0.25	-13.47	4.44e-20
rs7091556	cg10379346	-0.25	-13.47	4.44e-20
rs7091346	cg01727419	-0.09	-9.42	1.42e-13
rs10904038	cg17371064	-0.21	-11.43	6.55e-17
rs7919817	cg20673407	-0.34	-13.66	2.36e-20
rs2105282	cg20673407	-0.34	-13.62	2.7e-20
rs76502537	cg23771949	-0.18	-10.38	3.48e-15
rs7078199	cg26679884	0.41	11.65	2.98e-17
rs7918960	cg26679884	0.41	11.65	2.98e-17
rs10882435	cg07889765	-0.16	-13.39	5.89e-20
rs11187899	cg07889765	-0.16	-13.39	5.89e-20
rs55986122	cg15590007	0.12	10.73	9.19e-16
rs2099170	cg15590007	0.12	10.73	9.19e-16
rs7093571	cg13661397	-0.15	-10.03	1.32e-14
rs10795278	cg13661397	-0.15	-10.03	1.32e-14
rs2819723	cg27555617	-0.06	-18.18	1.58e-26
rs2786889	cg27555617	-0.06	-18.18	1.58e-26
rs1006368	cg00809775	0.11	10.12	9.3e-15
rs2295786	cg01727419	-0.1	-9.37	1.75e-13
rs11191833	cg01727419	-0.1	-9.37	1.75e-13
rs11001620	cg09553982	-0.18	-13.1	1.62e-19
rs1250583	cg06073814	0.14	9.75	3.93e-14
rs4917901	cg07570687	0.15	13.91	9.87e-21
rs7913021	cg06279296	0.22	16.11	7.72e-24
rs4881370	cg26679884	0.41	11.47	5.76e-17
rs11191839	cg01727419	-0.09	-8.63	3.23e-12
rs11191840	cg01727419	-0.09	-8.63	3.23e-12
rs10795293	cg26679884	0.4	11.17	1.73e-16
rs7901595	cg13563815	0.15	11.77	1.86e-17
rs10857566	cg14436939	-0.16	-13.24	9.86e-20
rs4748784	cg13562929	-0.16	-15.59	3.97e-23
rs2492769	cg27555617	-0.06	-18.18	1.58e-26
rs2786888	cg27555617	-0.06	-17.62	7.9e-26
rs11187900	cg07889765	-0.16	-13.39	5.89e-20
rs4881452	cg13661397	-0.15	-10.08	1.11e-14
rs4881453	cg13661397	-0.15	-10.08	1.11e-14
rs61849039	cg14240646	0.25	11.42	7.01e-17
rs4749240	cg14240646	0.25	11.42	7.01e-17
rs10882436	cg07889765	-0.16	-13.39	5.89e-20
rs11257368	cg21322043	0.33	13.12	1.49e-19
rs11253187	cg13661397	-0.15	-9.71	4.59e-14
rs4633386	cg07570687	0.15	14.21	3.61e-21
rs35906360	cg15590007	0.12	10.33	4.11e-15
rs2993981	cg11671940	0.22	16.85	7.91e-25
rs2993982	cg11671940	0.22	16.85	7.91e-25
rs2993985	cg11671940	0.22	16.85	7.91e-25
rs11187893	cg07889765	-0.16	-13.39	5.89e-20
rs11187894	cg07889765	-0.16	-13.39	5.89e-20
rs7477466	cg13661397	-0.15	-12.03	7.42e-18
rs4750128	cg21322043	0.33	13.12	1.49e-19
rs61848172	cg21322043	0.33	13.12	1.49e-19
rs55978138	cg15590007	0.12	10.33	4.11e-15
rs4918058	cg01727419	-0.1	-9.62	6.42e-14
rs11253064	cg06279296	0.22	15.47	5.8e-23
rs11245332	cg00809775	0.11	10.7	1.03e-15
rs9423611	cg13661397	-0.14	-11.73	2.16e-17
rs11188534	cg19681037	0.15	12.23	3.56e-18
rs7070067	cg26679884	0.4	11.48	5.51e-17
rs11188531	cg19681037	0.15	12.23	3.56e-18
rs55983834	cg01727419	-0.09	-9.32	2.08e-13
rs2420936	cg19650936	0.13	12.63	8.47e-19
rs11257388	cg21322043	0.33	13.25	9.68e-20
rs6481817	cg00146027	-0.14	-12.54	1.15e-18
rs7901543	cg00146027	-0.14	-12.54	1.15e-18
rs6481818	cg00146027	-0.14	-12.54	1.15e-18
rs6481819	cg00146027	-0.14	-12.54	1.15e-18
rs10795038	cg17371064	-0.2	-9.83	2.91e-14
rs7093269	cg17371064	-0.2	-9.83	2.91e-14
rs55744330	cg17371064	-0.2	-9.83	2.91e-14
rs2814446	cg27555617	-0.06	-14.65	8.34e-22
rs61871140	cg19681037	0.15	12.25	3.29e-18
rs55896038	cg19650936	0.13	12.63	8.47e-19
rs7091556	cg19650936	0.13	12.63	8.47e-19
rs4929793	cg13563815	0.16	13.95	8.6e-21
rs7915508	cg13563815	0.16	13.95	8.6e-21
rs28612146	cg13563815	0.16	13.95	8.6e-21
rs11239492	cg15590007	0.12	10.63	1.31e-15
rs10795294	cg26679884	0.4	11.17	1.73e-16
rs4881457	cg13661397	-0.15	-10.03	1.32e-14
rs4353201	cg26679884	0.4	11.19	1.63e-16
rs4881491	cg26679884	0.4	11.19	1.63e-16
rs67304285	cg09553982	-0.18	-11.72	2.28e-17
rs373485798;rs376308936;rs997907;rs68144911	cg26865853	-0.09	-11.11	2.21e-16
rs4881435	cg13661397	-0.15	-12.03	7.42e-18
rs7918430	cg13661397	-0.15	-12.03	7.42e-18
rs6601961	cg13661397	-0.15	-12.03	7.42e-18
rs11191829	cg01727419	-0.09	-8.82	1.52e-12
rs67764572	cg01727419	-0.1	-9.62	6.42e-14
rs2786900	cg27555617	-0.06	-14.22	3.49e-21
rs10795936	cg14675598	0.2	14.99	2.74e-22
rs6481820	cg00146027	-0.14	-12.54	1.15e-18
rs113255940	cg07570687	0.15	13.91	9.87e-21
rs10751928	cg17371064	-0.2	-10.93	4.38e-16
rs2802360	cg06073814	0.13	8.21	1.7e-11
rs11002769	cg05119883	0.24	13.17	1.26e-19
rs11191822	cg01727419	-0.09	-9.32	2.08e-13
rs2814447	cg27555617	-0.06	-14.31	2.63e-21
rs11190661	cg26540559	0.07	14.66	8.1e-22
rs61871589	cg26540559	0.07	14.66	8.1e-22
rs12267029	cg26540559	0.07	14.66	8.1e-22
rs7893218	cg06279296	0.22	16.11	7.72e-24
rs7919523	cg14240646	0.25	11.26	1.26e-16
rs9418756	cg06406458	-0.34	-15.91	1.45e-23
rs4462286	cg03955764	-0.12	-14.38	2.06e-21
rs11191836	cg01727419	-0.09	-9.24	2.94e-13
rs4444003	cg26679884	0.41	10.83	6.31e-16
rs816650	cg06279296	0.22	15.47	5.87e-23
rs4880615	cg17371064	-0.2	-10.3	4.7e-15
rs11593110	cg25423573	0.12	8.64	3.08e-12
rs2807735	cg11671940	0.22	16.85	7.91e-25
rs1416816	cg11671940	0.22	16.85	7.91e-25
rs2486638	cg11671940	0.22	16.85	7.91e-25
rs2420936	cg02210151	-0.17	-11.92	1.12e-17
rs4344425	cg19681037	0.15	12.25	3.27e-18
rs28496118	cg24443494	0.2	12.86	3.82e-19
rs11252919	cg06279296	0.21	13.35	6.81e-20
rs55896038	cg02210151	-0.17	-11.92	1.12e-17
rs7091556	cg02210151	-0.17	-11.92	1.12e-17
rs11250372	cg02305391	0.16	10.11	9.61e-15
rs10885620	cg19990189	-0.11	-11.77	1.91e-17
rs10786773	cg01727419	-0.09	-8.24	1.54e-11
rs4287273	cg26679884	0.41	10.72	9.43e-16
rs4929794	cg13563815	0.16	13.63	2.58e-20
rs200633850;rs373297316;rs544053516	cg15590007	0.12	10.51	2.12e-15
rs1426615	cg14812524	0.15	12.97	2.54e-19
rs3780896	cg15590007	0.12	8.11	2.52e-11
rs3780897	cg15590007	0.12	8.11	2.52e-11
rs9665365	cg15590007	0.12	10.65	1.25e-15
rs9418802	cg06406458	-0.34	-14.77	5.59e-22
rs9418695	cg06406458	-0.34	-16.05	9.34e-24
rs4242802	cg26679884	0.41	10.5	2.17e-15
rs11511620	cg15590007	0.12	10.65	1.25e-15
rs9418756	cg19572051	-0.2	-14.17	4.18e-21
rs12356109	cg15590007	0.12	10.63	1.31e-15
rs11511619	cg15590007	0.12	10.63	1.31e-15
rs61559520	cg19681037	0.15	12.28	2.93e-18
rs2694771	cg08240913	0.11	9.2	3.39e-13
rs201315774	cg02305391	0.16	10.11	9.61e-15
rs2790460	cg11671940	0.21	16.52	2.21e-24
rs2475213	cg01727419	-0.09	-8	4.02e-11
rs1057526	cg06406458	-0.34	-16.05	9.34e-24
rs3121059	cg11671940	0.21	14.51	1.33e-21
rs9418754	cg06406458	-0.33	-15.32	9.59e-23
rs2819722	cg27555617	-0.06	-14.31	2.63e-21
rs2786886	cg27555617	-0.06	-14.31	2.63e-21
rs2819726	cg27555617	-0.06	-14.31	2.63e-21
rs2485636	cg27555617	-0.06	-14.31	2.63e-21
rs2492772	cg27555617	-0.06	-14.31	2.63e-21
rs4354631	cg26679884	0.4	10.44	2.72e-15
rs11190574	cg07570687	0.15	14.91	3.58e-22
rs7898802	cg25423573	0.1	6.9	3.17e-09
rs7072508	cg08899523	0.23	11.63	3.13e-17
rs7918550	cg08899523	0.23	11.63	3.13e-17
rs7905593	cg08899523	0.23	11.63	3.13e-17
rs11594976	cg08899523	0.23	11.63	3.13e-17
rs28688373	cg08899523	0.23	11.63	3.13e-17
rs2819718	cg27555617	-0.06	-14.25	3.15e-21
rs7897382	cg14418922	-0.17	-9.5	1.04e-13
rs10887024	cg09943237	0.07	11.1	2.29e-16
rs11200264	cg13812702	0.12	12.02	7.48e-18
rs4329635	cg03955764	-0.11	-13.56	3.34e-20
rs4747950	cg21322043	0.33	13.25	9.68e-20
rs11257390	cg21322043	0.33	13.25	9.68e-20
rs9418754	cg19572051	-0.2	-13.88	1.1e-20
rs2819711	cg27555617	-0.06	-13.87	1.13e-20
rs57294882	cg19681037	0.15	12.28	2.93e-18
rs11255060	cg13562929	-0.16	-15.05	2.26e-22
rs58238740	cg15590007	0.12	7.79	9.32e-11
rs3780894	cg15590007	0.12	7.79	9.32e-11
rs3780895	cg15590007	0.12	7.79	9.32e-11
rs2310776	cg15590007	0.12	7.79	9.32e-11
rs17157736	cg15590007	0.12	7.79	9.32e-11
rs7077891	cg15590007	0.12	7.79	9.32e-11
rs11191865	cg26865853	-0.09	-10.34	4.01e-15
rs1057526	cg19572051	-0.2	-14.6	9.84e-22
rs1563822	cg07899896	0.19	11.19	1.62e-16
rs35818904	cg05119883	0.25	13.64	2.52e-20
rs28379249	cg13563815	0.16	12.38	2.11e-18
rs7076074	cg13563815	0.16	12.38	2.11e-18
rs9418802	cg19572051	-0.2	-13.36	6.48e-20
rs7906287	cg26679884	0.4	10.56	1.75e-15
rs9418788	cg06406458	-0.34	-16.05	9.34e-24
rs1057527	cg06406458	-0.34	-16.05	9.34e-24
rs2067832	cg26865853	-0.09	-10.2	6.89e-15
rs58543155	cg26865853	-0.09	-10.2	6.89e-15
rs34300861	cg26865853	-0.09	-10.2	6.89e-15
rs61277100	cg26865853	-0.09	-10.2	6.89e-15
rs34887477	cg26865853	-0.09	-10.2	6.89e-15
rs4918067	cg26865853	-0.09	-10.2	6.89e-15
rs4918068	cg26865853	-0.09	-10.2	6.89e-15
rs9325507	cg26865853	-0.09	-10.2	6.89e-15
rs3814220	cg26865853	-0.09	-10.2	6.89e-15
rs11191843	cg26865853	-0.09	-10.2	6.89e-15
rs2273698	cg26865853	-0.09	-10.2	6.89e-15
rs11191846	cg26865853	-0.09	-10.2	6.89e-15
rs10883940	cg26865853	-0.09	-10.2	6.89e-15
rs11191847	cg26865853	-0.09	-10.2	6.89e-15
rs10883941	cg26865853	-0.09	-10.2	6.89e-15
rs11191848	cg26865853	-0.09	-10.2	6.89e-15
rs11191849	cg26865853	-0.09	-10.2	6.89e-15
rs10883942	cg26865853	-0.09	-10.2	6.89e-15
rs10883943	cg26865853	-0.09	-10.2	6.89e-15
rs1980653	cg26865853	-0.09	-10.2	6.89e-15
rs11598018	cg26865853	-0.09	-10.2	6.89e-15
rs10883948	cg26865853	-0.09	-10.2	6.89e-15
rs1570221	cg01727419	-0.09	-8	4.02e-11
rs2475216	cg01727419	-0.09	-8	4.02e-11
rs9420904	cg01727419	-0.09	-8	4.02e-11
rs149676388	cg01727419	-0.09	-8	4.02e-11
rs371240513	cg01727419	-0.09	-8	4.02e-11
rs12765878	cg26865853	-0.09	-10.2	6.89e-15
rs374586152	cg01727419	-0.09	-8	4.02e-11
rs61871138	cg19681037	0.15	12.23	3.56e-18
rs11250370	cg02305391	0.16	9.51	9.98e-14
rs2993980	cg11671940	0.21	14.54	1.2e-21
rs11239485	cg15590007	0.12	11.06	2.64e-16
rs3904957	cg03955764	-0.12	-14.47	1.53e-21
rs946594	cg11671940	0.21	14.54	1.2e-21
rs1416817	cg11671940	0.21	14.54	1.2e-21
rs2998285	cg11671940	0.21	14.54	1.2e-21
rs4237390	cg11671940	0.21	14.54	1.2e-21
rs2486637	cg11671940	0.21	14.54	1.2e-21
rs9418695	cg19572051	-0.2	-14.6	9.84e-22
rs56163820	cg27555617	-0.06	-13.61	2.77e-20
rs9418788	cg19572051	-0.2	-14.6	9.84e-22
rs1057527	cg19572051	-0.2	-14.6	9.84e-22
rs12217597	cg07889765	-0.17	-12.72	6.12e-19
rs73574227	cg06279296	0.21	12.15	4.74e-18
rs60842538	cg15590007	0.12	8.11	2.52e-11
rs3780899	cg15590007	0.12	8.11	2.52e-11
rs10904504	cg13661397	-0.15	-10.14	8.81e-15
rs370232405	cg15590007	0.12	10.73	9.19e-16
rs12774369	cg15590007	0.12	7.79	9.32e-11
rs7901736	cg17371064	-0.19	-10.46	2.5e-15
rs73576221	cg06279296	0.22	11.75	2e-17
rs4881459	cg13661397	-0.15	-9.13	4.42e-13
rs2694764	cg08240913	0.11	8.5	5.48e-12
rs2245164	cg08240913	0.11	8.5	5.48e-12
rs2694770	cg08240913	0.11	8.5	5.48e-12
rs4751956	cg08240913	0.11	8.5	5.48e-12
rs3781552	cg08240913	0.11	8.5	5.48e-12
rs7072508	cg07044115	-0.26	-13.11	1.55e-19
rs7918550	cg07044115	-0.26	-13.11	1.55e-19
rs7905593	cg07044115	-0.26	-13.11	1.55e-19
rs11594976	cg07044115	-0.26	-13.11	1.55e-19
rs28688373	cg07044115	-0.26	-13.11	1.55e-19
rs7902280	cg08899523	0.23	10.74	8.89e-16
rs284624	cg07899896	0.18	10.15	8.33e-15
rs284622	cg07899896	0.18	10.15	8.33e-15
rs2446721	cg07899896	0.19	9.7	4.78e-14
rs1903252	cg07899896	0.19	9.7	4.78e-14
rs1903253	cg07899896	0.19	9.7	4.78e-14
rs1824428	cg07899896	0.19	9.7	4.78e-14
rs2446719	cg07899896	0.19	9.7	4.78e-14
rs2694768	cg08240913	0.11	8.5	5.48e-12
rs2694769	cg08240913	0.11	8.5	5.48e-12
rs3862875	cg03955764	-0.12	-13.99	7.55e-21
rs2393534	cg07899896	0.18	9.56	8.32e-14
rs10763599	cg07899896	0.18	9.56	8.32e-14
rs898372	cg07899896	0.19	11.19	1.62e-16
rs2780669	cg14240646	0.26	12.12	5.32e-18
rs2993987	cg11671940	0.23	12.29	2.82e-18
rs1572536	cg17371064	-0.19	-10.09	1.06e-14
rs7920264	cg19754622	0.25	15.83	1.83e-23
rs4313493	cg27555617	-0.06	-13.64	2.47e-20
rs72815521	cg09553982	-0.17	-8.9	1.1e-12
rs11245348	cg00809775	0.11	10.7	1.03e-15
rs2062387	cg00809775	0.11	10.7	1.03e-15
rs34402725	cg00809775	0.11	10.7	1.03e-15
rs7902846	cg00809775	0.11	10.7	1.03e-15
rs35137435	cg00809775	0.11	10.7	1.03e-15
rs11595063	cg00809775	0.11	10.7	1.03e-15
rs12416106	cg00809775	0.11	10.7	1.03e-15
rs4962698	cg00809775	0.11	10.7	1.03e-15
rs4962407	cg00809775	0.11	10.7	1.03e-15
rs112172847	cg00809775	0.11	10.7	1.03e-15
rs807022	cg02932204	0.26	14.72	6.68e-22
rs1073109	cg08899523	0.22	10.42	2.99e-15
rs7094002	cg17371064	-0.19	-10.05	1.24e-14
rs3824613	cg15590007	0.12	7.79	9.32e-11
rs28395865	cg15590007	0.12	7.83	7.84e-11
rs55840159	cg13661397	-0.15	-10.16	7.91e-15
rs72779837	cg13661397	-0.15	-10.16	7.91e-15
rs6601965	cg13661397	-0.15	-10.16	7.91e-15
rs28451239	cg13661397	-0.15	-10.16	7.91e-15
rs7073877	cg13661397	-0.15	-10.16	7.91e-15
rs11253172	cg13661397	-0.15	-10.16	7.91e-15
rs11253176	cg13661397	-0.15	-10.16	7.91e-15
rs7078942	cg13661397	-0.15	-10.16	7.91e-15
rs11253180	cg13661397	-0.15	-10.16	7.91e-15
rs7076318	cg13661397	-0.15	-10.16	7.91e-15
rs12570751	cg13661397	-0.15	-10.16	7.91e-15
rs56676146	cg13661397	-0.15	-10.16	7.91e-15
rs7097341	cg13661397	-0.15	-10.16	7.91e-15
rs2902639	cg26865853	-0.09	-10.2	6.89e-15
rs10793585	cg03955764	-0.12	-13.41	5.55e-20
rs3780898	cg15590007	0.12	7.83	7.84e-11
rs1780091	cg14240646	0.26	11.9	1.2e-17
rs11239497	cg15590007	0.11	7.51	2.77e-10
rs4500437	cg03955764	-0.11	-13.56	3.34e-20
rs4511242	cg03955764	-0.11	-13.56	3.34e-20
rs12413346	cg03955764	-0.11	-13.56	3.34e-20
rs284619	cg07899896	0.18	9.9	2.2e-14
rs419515	cg07899896	0.18	9.9	2.2e-14
rs284617	cg07899896	0.18	9.9	2.2e-14
rs2993986	cg11671940	0.23	11.88	1.28e-17
rs4752256	cg07733920	-0.11	-11.82	1.56e-17
rs1924034	cg07733920	-0.11	-11.82	1.56e-17
rs4929792	cg13563815	0.15	10.94	4.09e-16
rs2780667	cg14240646	0.26	11.9	1.2e-17
rs7072508	cg16653991	0.24	13.27	9.08e-20
rs7918550	cg16653991	0.24	13.27	9.08e-20
rs7905593	cg16653991	0.24	13.27	9.08e-20
rs11594976	cg16653991	0.24	13.27	9.08e-20
rs28688373	cg16653991	0.24	13.27	9.08e-20
rs7475717	cg13661397	-0.14	-11.52	4.79e-17
rs7068437	cg17371064	-0.19	-9.58	7.51e-14
rs2277264	cg00809775	0.11	10.7	1.03e-15
rs12764190	cg13562929	-0.16	-14.91	3.62e-22
rs35223321	cg26865853	-0.09	-10.2	6.89e-15
rs4752256	cg19990189	-0.11	-10.56	1.73e-15
rs1924034	cg19990189	-0.11	-10.56	1.73e-15
rs28607366	cg24443494	0.2	11.25	1.28e-16
rs7072508	cg06791446	-0.2	-13.84	1.25e-20
rs7918550	cg06791446	-0.2	-13.84	1.25e-20
rs7905593	cg06791446	-0.2	-13.84	1.25e-20
rs11594976	cg06791446	-0.2	-13.84	1.25e-20
rs28688373	cg06791446	-0.2	-13.84	1.25e-20
rs10885620	cg07733920	-0.11	-11.95	9.97e-18
rs2780675	cg14240646	0.24	11.27	1.22e-16
rs1328602	cg14240646	0.26	11.9	1.2e-17
rs7084967	cg07899896	0.18	9.68	5.08e-14
rs11191841	cg26865853	-0.09	-8.99	7.75e-13
rs7100920	cg26865853	-0.09	-9.91	2.15e-14
rs2436569	cg07899896	0.18	9.57	8.06e-14
rs2436566	cg07899896	0.18	9.57	8.06e-14
rs7902280	cg07044115	-0.26	-11.92	1.09e-17
rs7908527	cg07899896	0.18	9.22	3.07e-13
rs4508155	cg07899896	0.18	9.22	3.07e-13
rs10509099	cg07899896	0.18	9.22	3.07e-13
rs5030903	cg14418922	-0.19	-8.84	1.41e-12
rs10904532	cg26679884	0.41	11.63	3.22e-17
rs2298075	cg07570687	0.15	13.89	1.06e-20
rs2790447	cg11671940	0.23	12.29	2.82e-18
rs2993989	cg11671940	0.23	12.29	2.82e-18
rs2185293	cg11671940	0.23	12.29	2.82e-18
rs2807732	cg11671940	0.23	12.29	2.82e-18
rs2790436	cg11671940	0.23	12.29	2.82e-18
rs2807730	cg11671940	0.23	12.29	2.82e-18
rs2993991	cg11671940	0.23	12.29	2.82e-18
rs2998283	cg11671940	0.23	12.29	2.82e-18
rs2993992	cg11671940	0.23	12.29	2.82e-18
rs2491251	cg11671940	0.23	12.29	2.82e-18
rs2807728	cg11671940	0.23	12.29	2.82e-18
rs1339704	cg11671940	0.23	12.29	2.82e-18
rs3008365	cg06550582	0.1	10.99	3.4e-16
rs141938292	cg07899896	0.18	9.66	5.5e-14
rs112140735	cg00809775	0.11	10.7	1.03e-15
rs4962405	cg00809775	0.11	10.7	1.03e-15
rs1380555	cg07899896	0.18	9.43	1.36e-13
rs758585	cg07733920	-0.11	-11.82	1.56e-17
rs4453185	cg03955764	-0.12	-12.9	3.25e-19
rs2783433	cg07158320	-0.25	-16.74	1.11e-24
rs2842085	cg18768136	-0.13	-8.45	6.61e-12
rs2842086	cg18768136	-0.13	-8.45	6.61e-12
rs5784065	cg11671940	0.23	12.38	2.07e-18
rs2783432	cg07158320	-0.25	-16.56	1.93e-24
rs2440866	cg07899896	0.18	9.09	5.28e-13
rs10795039	cg17371064	-0.19	-9.58	7.51e-14
rs10904490	cg13661397	-0.14	-10.69	1.05e-15
rs7476837	cg13661397	-0.14	-10.69	1.05e-15
rs6601960	cg13661397	-0.14	-10.69	1.05e-15
rs1073109	cg07044115	-0.25	-11.6	3.55e-17
rs10905133	cg13562929	-0.16	-15.05	2.26e-22
rs7901687	cg07899896	0.19	9.71	4.6e-14
rs7097903	cg14812524	0.15	11.34	9.1e-17
rs10887024	cg20835665	0.07	15.04	2.31e-22
rs12761999	cg08240913	0.11	8.5	5.48e-12
rs7906411	cg20867662	0.12	10.27	5.29e-15
rs1227063	cg00541421	-0.1	-11.58	3.78e-17
rs7083111	cg15590007	0.12	9.63	6.39e-14
rs11009926	cg20867662	0.12	10.12	9.24e-15
rs7099563	cg20867662	0.12	10.12	9.24e-15
rs61840962	cg20867662	0.12	10.12	9.24e-15
rs2921273	cg07899896	0.18	9.68	5.08e-14
rs12767947	cg13562929	-0.16	-15.05	2.26e-22
rs7072508	cg19650936	0.12	10.35	3.84e-15
rs7918550	cg19650936	0.12	10.35	3.84e-15
rs7905593	cg19650936	0.12	10.35	3.84e-15
rs11594976	cg19650936	0.12	10.35	3.84e-15
rs28688373	cg19650936	0.12	10.35	3.84e-15
rs2805921	cg14418922	-0.16	-6.73	6.38e-09
rs7072508	cg25052156	-0.19	-13.57	3.2e-20
rs7918550	cg25052156	-0.19	-13.57	3.2e-20
rs7905593	cg25052156	-0.19	-13.57	3.2e-20
rs11594976	cg25052156	-0.19	-13.57	3.2e-20
rs28688373	cg25052156	-0.19	-13.57	3.2e-20
rs2842084	cg18768136	-0.13	-8.45	6.61e-12
rs55759483	cg07733920	0.11	11.83	1.51e-17
rs7908237	cg07733920	0.11	11.83	1.51e-17
rs7902280	cg16653991	0.24	12.22	3.68e-18
rs7915211	cg20867662	0.12	10.14	8.78e-15
rs1035796	cg14812524	0.15	13.11	1.59e-19
rs945796	cg17371064	-0.19	-10.05	1.21e-14
rs10904503	cg13661397	-0.15	-9.97	1.67e-14
rs10795036	cg17371064	-0.2	-9.41	1.49e-13
rs72779830	cg13661397	-0.14	-10.11	9.75e-15
rs12571693	cg13661397	-0.14	-10.11	9.75e-15
rs2452512	cg07899896	0.18	9.38	1.64e-13
rs9417141	cg20867662	0.12	10.12	9.24e-15
rs9415990	cg00541421	-0.1	-10	1.47e-14
rs9329321	cg13661397	-0.14	-10.42	2.94e-15
rs2795093;rs386742401	cg07158320	-0.23	-14.28	2.86e-21
rs2245070	cg08240913	0.11	8.12	2.48e-11
rs1144510	cg14240646	0.25	11.26	1.23e-16
rs2452522	cg07899896	0.18	9.66	5.5e-14
rs1107030	cg08240913	0.11	8.12	2.48e-11
rs12413276	cg02305391	0.16	8.47	6.17e-12
rs4752560	cg08899523	0.22	10.99	3.44e-16
rs1856591	cg03955764	-0.11	-14.08	5.52e-21
rs4752562	cg08899523	0.22	10.91	4.61e-16
rs13377143	cg07899896	0.18	10.42	2.93e-15
rs59747214	cg07899896	0.18	10.42	2.93e-15
rs1563824	cg07899896	0.18	10.42	2.93e-15
rs7905293	cg07899896	0.18	10.42	2.93e-15
rs1073109	cg06791446	-0.19	-12.26	3.22e-18
rs1073109	cg16653991	0.23	11.9	1.19e-17
rs4313486	cg14939821	0.14	10.17	7.79e-15
rs10829375	cg14939821	0.14	10.17	7.79e-15
rs2489403	cg14939821	0.14	10.17	7.79e-15
rs2483857	cg14939821	0.14	10.17	7.79e-15
rs2483858	cg14939821	0.14	10.17	7.79e-15
rs16935722	cg20867662	0.12	9.61	6.67e-14
rs2153333	cg03955764	-0.12	-13.48	4.31e-20
rs4068926	cg03955764	-0.12	-13.48	4.31e-20
rs4379782	cg03955764	-0.12	-13.48	4.31e-20
rs3862873	cg03955764	-0.12	-13.48	4.31e-20
rs3927771	cg03955764	-0.12	-13.48	4.31e-20
rs61852603	cg03955764	-0.12	-12.33	2.48e-18
rs9418117	cg20867662	0.12	10.12	9.24e-15
rs10905132	cg13562929	-0.16	-15.44	6.36e-23
rs3850671	cg26865853	-0.09	-10.2	6.93e-15
rs7902280	cg19650936	0.12	9.82	2.96e-14
rs7902280	cg06791446	-0.2	-12.12	5.21e-18
rs3862874	cg03955764	-0.12	-13.06	1.85e-19
rs4285830	cg03955764	-0.12	-13.04	2.02e-19
rs10793586	cg03955764	-0.12	-12.33	2.48e-18
rs7072375	cg03955764	-0.12	-12.33	2.48e-18
rs4120893	cg03955764	-0.12	-12.33	2.48e-18
rs10882698	cg19681037	0.15	11.32	1.01e-16
rs10903414	cg02305391	0.16	13.2	1.14e-19
rs1073109	cg19650936	0.12	9.93	1.97e-14
rs12267435	cg07899896	0.18	9.4	1.55e-13
rs284621	cg07899896	0.18	9.82	2.98e-14
rs5006854	cg03955764	-0.12	-12.16	4.66e-18
rs5006853	cg03955764	-0.12	-12.16	4.66e-18
rs5006852	cg03955764	-0.12	-12.16	4.66e-18
rs4472887	cg03955764	-0.12	-12.16	4.66e-18
rs7474730	cg13661397	-0.14	-10.69	1.05e-15
rs2251968	cg07899896	0.18	8.9	1.12e-12
rs2814448	cg27555617	-0.06	-16.86	7.72e-25
rs7895830	cg19990189	-0.11	-10.56	1.73e-15
rs1073109	cg25052156	-0.19	-12.45	1.63e-18
rs3008366	cg06550582	0.1	11.53	4.54e-17
rs2694766	cg08240913	0.1	7.89	6.04e-11
rs11190569	cg07570687	0.15	13.95	8.8e-21
rs9420782	cg07570687	0.14	10.78	7.6e-16
rs9420785	cg07570687	0.14	10.78	7.6e-16
rs4919466	cg07570687	0.14	10.78	7.6e-16
rs10904496	cg13661397	-0.15	-10.16	7.91e-15
rs10904497	cg13661397	-0.15	-10.16	7.91e-15
rs11190664	cg26540559	0.07	12.41	1.89e-18
rs758585	cg19990189	-0.11	-10.56	1.73e-15
rs12573103	cg26865853	-0.09	-10.84	6.06e-16
rs7071102	cg07899896	0.18	9.2	3.38e-13
rs4068923	cg03955764	-0.11	-12.82	4.35e-19
rs10904507	cg13661397	-0.15	-9.08	5.4e-13
rs1250600	cg18737081	0.11	10.45	2.61e-15
rs2694763	cg08240913	0.11	8.12	2.48e-11
rs7895912	cg13661397	-0.14	-10.4	3.23e-15
rs11253158	cg13661397	-0.14	-10.4	3.23e-15
rs2790448	cg11671940	0.22	10.9	4.8e-16
rs2807734	cg11671940	0.22	10.9	4.8e-16
rs2095901	cg11671940	0.22	10.9	4.8e-16
rs2993990	cg11671940	0.22	10.9	4.8e-16
rs2486639	cg11671940	0.22	10.9	4.8e-16
rs998362	cg11671940	0.22	10.9	4.8e-16
rs17554925	cg05119883	0.24	11.04	2.84e-16
rs4751958	cg08240913	0.1	7.47	3.29e-10
rs1831187	cg23656959	0.11	12.09	5.83e-18
rs1539089	cg07570687	0.13	10.46	2.6e-15
rs2807763	cg11671940	0.22	10.75	8.44e-16
rs7076936	cg14623216	0.07	10.06	1.16e-14
rs7895830	cg07733920	-0.11	-11.82	1.56e-17
rs56150414	cg20848186	0.1	10.35	3.93e-15
rs6593482	cg20848186	0.1	10.23	6.05e-15
rs67008983	cg20848186	0.1	10.23	6.05e-15
rs55787481	cg20848186	0.1	10.23	6.05e-15
rs12783095	cg20848186	0.1	10.23	6.05e-15
rs17157728	cg20848186	0.1	10.23	6.05e-15
rs17157733	cg20848186	0.1	10.23	6.05e-15
rs151239879	cg20848186	0.1	10.2	6.78e-15
rs150423942	cg20848186	0.1	10.2	6.78e-15
rs75129876	cg20848186	0.1	10.2	6.78e-15
rs77200598	cg20848186	0.1	10.2	6.78e-15
rs55717607	cg20848186	0.1	10.2	6.78e-15
rs11239491	cg20848186	0.1	10.2	6.78e-15
rs7084793	cg20848186	0.1	10.2	6.78e-15
rs7921503	cg20848186	0.1	10.2	6.78e-15
rs7909740	cg20848186	0.1	10.2	6.78e-15
rs7909768	cg20848186	0.1	10.2	6.78e-15
rs7913488	cg20848186	0.1	10.2	6.78e-15
rs67491417	cg20848186	0.1	10.2	6.78e-15
rs6413416	cg20848186	0.1	10.2	6.78e-15
rs4986832	cg20848186	0.1	10.2	6.78e-15
rs7913948	cg20848186	0.1	10.2	6.78e-15
rs12762303	cg20848186	0.1	10.2	6.78e-15
rs78137087	cg20848186	0.1	10.2	6.78e-15
rs72561472	cg20848186	0.1	10.2	6.78e-15
rs4987106	cg20848186	0.1	10.2	6.78e-15
rs111528152	cg20848186	0.1	10.2	6.78e-15
rs12763738	cg20848186	0.1	10.2	6.78e-15
rs66489870	cg20848186	0.1	10.2	6.78e-15
rs71494775	cg20848186	0.1	10.2	6.78e-15
rs1864414	cg20848186	0.1	10.2	6.78e-15
rs1864413	cg20848186	0.1	10.2	6.78e-15
rs1864412	cg20848186	0.1	10.2	6.78e-15
rs7073550	cg07570687	0.15	11.82	1.6e-17
rs7920217;rs71485762	cg26865853	-0.09	-10.2	6.89e-15
rs6588753	cg13563815	0.15	10.87	5.39e-16
rs11599597	cg17371064	-0.19	-9.72	4.44e-14
rs7093951	cg13185377	0.18	11.15	1.87e-16
rs67354918	cg13185377	0.18	11.15	1.87e-16
rs7902280	cg25052156	-0.19	-12.04	7.13e-18
rs11197593	cg08240913	0.1	7.36	5.19e-10
rs7072508	cg02210151	-0.16	-10.35	3.81e-15
rs7918550	cg02210151	-0.16	-10.35	3.81e-15
rs7905593	cg02210151	-0.16	-10.35	3.81e-15
rs11594976	cg02210151	-0.16	-10.35	3.81e-15
rs28688373	cg02210151	-0.16	-10.35	3.81e-15
rs11197587	cg08240913	0.11	8.12	2.48e-11
rs7100363	cg06279296	0.2	12.06	6.61e-18
rs7095816	cg07733920	-0.11	-11.06	2.61e-16
rs2780681	cg14240646	0.24	11.27	1.22e-16
rs2243922	cg14240646	0.24	11.27	1.22e-16
rs2446718	cg07899896	0.19	9.7	4.78e-14
rs2446722	cg07899896	0.19	9.7	4.78e-14
rs1459990	cg07899896	0.19	9.7	4.78e-14
rs111634827	cg03955764	-0.12	-11.94	1e-17
rs9419897	cg07570687	0.14	10.78	7.6e-16
rs10776595	cg14436939	-0.15	-10.11	9.77e-15
rs2082108	cg20848186	0.1	10.2	6.78e-15
rs12354994	cg20848186	0.1	10.2	6.78e-15
rs12354742	cg20848186	0.1	10.2	6.78e-15
rs11517281	cg20848186	0.1	10.2	6.78e-15
rs12359299	cg20848186	0.1	10.2	6.78e-15
rs11523408	cg20848186	0.1	10.2	6.78e-15
rs807023	cg02932204	0.25	15.23	1.27e-22
rs1073109	cg02210151	-0.16	-10.11	9.66e-15
rs11253163	cg13185377	0.18	11.15	1.87e-16
rs73369330	cg00809775	0.1	8.5	5.42e-12
rs3008363	cg06550582	0.1	10.87	5.3e-16
rs944909	cg23656959	0.11	12.09	5.83e-18
rs1831188	cg23656959	0.11	11.95	9.75e-18
rs2185402	cg19572051	-0.2	-14.22	3.51e-21
rs2452503	cg07899896	0.18	9.12	4.62e-13
rs2446720	cg07899896	0.18	9.12	4.62e-13
rs145657016	cg07570687	0.13	10.21	6.66e-15
rs61852602	cg03955764	-0.12	-11.66	2.88e-17
rs12267488	cg03955764	-0.12	-11.66	2.88e-17
rs7072508	cg10379346	-0.25	-12.68	7.13e-19
rs7918550	cg10379346	-0.25	-12.68	7.13e-19
rs7905593	cg10379346	-0.25	-12.68	7.13e-19
rs11594976	cg10379346	-0.25	-12.68	7.13e-19
rs28688373	cg10379346	-0.25	-12.68	7.13e-19
rs2800396	cg23656959	0.11	12.09	5.83e-18
rs4919461	cg07570687	0.13	9.99	1.55e-14
rs12359302	cg20848186	0.1	10.28	5.09e-15
rs10776596	cg14436939	-0.15	-10.11	9.77e-15
rs17663387	cg07733920	0.11	11.82	1.56e-17
rs11819372	cg07733920	0.11	11.82	1.56e-17
rs10885618	cg07733920	0.11	11.82	1.56e-17
rs11101290	cg14436939	-0.15	-9.97	1.66e-14
rs58217739	cg13185377	0.18	11.15	1.87e-16
rs7095799	cg03955764	-0.11	-12.82	4.35e-19
rs10751371	cg03955764	-0.12	-13.04	2.02e-19
rs7922848	cg03955764	-0.12	-11.66	2.88e-17
rs1961333	cg03955764	-0.12	-11.66	2.88e-17
rs1961334	cg03955764	-0.12	-11.66	2.88e-17
rs7084047	cg03955764	-0.12	-11.66	2.88e-17
rs7084452	cg03955764	-0.12	-11.66	2.88e-17
rs4113135	cg03955764	-0.12	-11.66	2.88e-17
rs867631	cg14436939	-0.15	-9.94	1.92e-14
rs1919708	cg14436939	-0.15	-9.94	1.92e-14
rs2691154	cg13398715	-0.14	-11.82	1.57e-17
rs2800397	cg23656959	0.11	12.1	5.65e-18
rs2780673	cg23656959	0.11	12.1	5.65e-18
rs11598804	cg00809775	0.1	8.5	5.42e-12
rs9415035	cg00541421	-0.1	-10	1.47e-14
rs7089608	cg03955764	-0.12	-11.66	2.88e-17
rs10900166	cg03955764	-0.12	-11.66	2.88e-17
rs2386638	cg14623216	0.07	9.61	6.66e-14
rs2386637	cg14623216	0.07	9.61	6.66e-14
rs2892076	cg14623216	0.07	9.61	6.66e-14
rs2892075	cg14623216	0.07	9.61	6.66e-14
rs3763698	cg14623216	0.07	9.61	6.66e-14
rs7914425	cg13185377	0.18	11.03	2.99e-16
rs7917823	cg13185377	0.18	11.03	2.99e-16
rs7917949	cg13185377	0.18	11.03	2.99e-16
rs7074740	cg13185377	0.18	11.03	2.99e-16
rs734371	cg14436939	-0.15	-9.94	1.92e-14
rs2590381	cg14436939	-0.15	-9.94	1.92e-14
rs2463960	cg14436939	-0.15	-9.94	1.92e-14
rs2800405	cg23656959	0.11	12.09	5.83e-18
rs2800401	cg23656959	0.11	12.09	5.83e-18
rs2800398	cg23656959	0.11	12.09	5.83e-18
rs2780671	cg23656959	0.11	12.09	5.83e-18
rs17531317	cg23656959	0.11	12.09	5.83e-18
rs372705329;rs17531324;rs370944053	cg23656959	0.11	12.09	5.83e-18
rs2800395	cg23656959	0.11	12.09	5.83e-18
rs1780090	cg23656959	0.11	12.09	5.83e-18
rs1780093	cg23656959	0.11	12.09	5.83e-18
rs2797079	cg23656959	0.11	12.09	5.83e-18
rs2800393	cg23656959	0.11	12.09	5.83e-18
rs2800391	cg23656959	0.11	12.09	5.83e-18
rs7917207	cg23656959	0.11	12.09	5.83e-18
rs7914155	cg23656959	0.11	12.09	5.83e-18
rs2780665	cg23656959	0.11	12.09	5.83e-18
rs2770201	cg23656959	0.11	12.09	5.83e-18
rs2770200	cg23656959	0.11	12.09	5.83e-18
rs4274153	cg07570687	0.13	10.1	1.02e-14
rs58828402	cg13185377	0.18	11.15	1.87e-16
rs2073338	cg01727419	-0.09	-8.29	1.25e-11
rs1076972	cg08240913	0.11	8.12	2.48e-11
rs12766388	cg08240913	0.11	8.12	2.48e-11
rs2802362	cg06073814	0.13	9.09	5.15e-13
rs3827680	cg14436939	-0.15	-9.94	1.92e-14
rs7904142	cg14436939	-0.15	-9.94	1.92e-14
rs9888128	cg14436939	-0.15	-9.94	1.92e-14
rs11101317	cg14436939	-0.15	-9.94	1.92e-14
rs11101318	cg14436939	-0.15	-9.94	1.92e-14
rs2800394	cg23656959	0.11	12.06	6.57e-18
rs1265166	cg01727419	-0.09	-8	4.02e-11
rs7909296	cg20867662	0.12	9.4	1.57e-13
rs12570113	cg13661397	-0.14	-8.88	1.2e-12
rs2393537	cg07899896	0.18	9.61	6.66e-14
rs75474563	cg14623216	0.07	9.23	3.05e-13
rs11598434	cg14436939	-0.15	-9.94	1.92e-14
rs4948947	cg03955764	-0.12	-12.43	1.76e-18
rs12255632	cg13185377	0.18	10.7	1.01e-15
rs2683599	cg00809775	0.1	8.66	2.84e-12
rs56178329	cg14623216	0.07	9.61	6.66e-14
rs3814203	cg14623216	0.07	9.61	6.66e-14
rs3814202	cg14623216	0.07	9.61	6.66e-14
rs5019339	cg14623216	0.07	9.61	6.66e-14
rs5019340	cg14623216	0.07	9.61	6.66e-14
rs1417823	cg07570687	0.13	10.46	2.6e-15
rs2807743	cg11671940	0.21	13.9	1.03e-20
rs1548085	cg07899896	0.19	11.19	1.62e-16
rs2489374	cg23656959	0.11	12.09	5.83e-18
rs55759483	cg19990189	0.11	10.56	1.75e-15
rs7908237	cg19990189	0.11	10.56	1.75e-15
rs7923693	cg07733920	0.11	11.01	3.17e-16
rs10883944	cg01727419	-0.08	-7.4	4.36e-10
rs73581620	cg13185377	0.18	11.03	2.99e-16
rs113210208	cg13185377	0.18	11.03	2.99e-16
rs7912391	cg13185377	0.18	11.03	2.99e-16
rs1563822	cg23272287	0.19	9.52	9.59e-14
rs12252088	cg13185377	0.18	11.03	2.99e-16
rs2780680	cg23656959	0.11	12.09	5.83e-18
rs2780679	cg23656959	0.11	12.09	5.83e-18
rs2185402	cg06406458	-0.34	-15.66	3.24e-23
rs17531310	cg23656959	0.11	12.21	3.84e-18
rs55986122	cg20848186	0.1	9.66	5.52e-14
rs2099170	cg20848186	0.1	9.66	5.52e-14
rs12266646	cg13185377	0.19	11.24	1.36e-16
rs35906360	cg20848186	0.1	9.65	5.75e-14
rs2452499	cg07899896	0.17	8.83	1.44e-12
rs7092842	cg13661397	-0.14	-10.56	1.73e-15
rs3255	cg13661397	-0.14	-10.56	1.73e-15
rs7076375	cg23027329	-0.1	-10.28	5.08e-15
rs2698761	cg14436939	-0.15	-10.15	8.46e-15
rs2245518	cg17402294	0.1	11.73	2.21e-17
rs17663387	cg19990189	0.11	10.56	1.73e-15
rs11819372	cg19990189	0.11	10.56	1.73e-15
rs10885618	cg19990189	0.11	10.56	1.73e-15
rs672785	cg04701817	0.1	12.29	2.87e-18
rs284624	cg23272287	0.18	9.12	4.6e-13
rs284622	cg23272287	0.18	9.12	4.6e-13
rs7902280	cg02210151	-0.16	-9.49	1.08e-13
rs11253185	cg13661397	-0.15	-9.08	5.4e-13
rs14327	cg18768136	-0.13	-8.45	6.61e-12
rs2802369	cg06073814	0.14	8.82	1.5e-12
rs2279337	cg25423573	0.11	7.78	9.62e-11
rs1073109	cg10379346	-0.24	-11.61	3.36e-17
rs11253182	cg13661397	-0.15	-9.47	1.17e-13
rs4962401	cg00809775	0.1	8.5	5.42e-12
rs10763601	cg07899896	0.18	9.56	8.36e-14
rs7097037	cg14623216	0.07	10.06	1.16e-14
rs7085382	cg14623216	0.07	10.06	1.16e-14
rs7916800	cg07899896	0.18	9.08	5.42e-13
rs4752562	cg16653991	0.23	12.21	3.8e-18
rs2452505	cg07899896	0.18	9.69	4.91e-14
rs8428	cg14436939	-0.15	-9.94	1.92e-14
rs4752560	cg16653991	0.23	12.29	2.84e-18
rs10793584	cg03955764	-0.11	-12.18	4.3e-18
rs11001618	cg09553982	-0.16	-10.71	9.87e-16
rs4881439	cg13661397	-0.15	-10.69	1.08e-15
rs11101320	cg14436939	-0.15	-9.94	1.92e-14
rs7086275	cg14436939	-0.15	-9.94	1.92e-14
rs6601964	cg13661397	-0.15	-9.08	5.4e-13
rs12572605	cg13661397	-0.15	-9.08	5.4e-13
rs7091237	cg13661397	-0.15	-9.08	5.4e-13
rs10904499	cg13661397	-0.15	-9.08	5.4e-13
rs10904500	cg13661397	-0.15	-9.08	5.4e-13
rs72779844	cg13661397	-0.15	-9.08	5.4e-13
rs72779845	cg13661397	-0.15	-9.08	5.4e-13
rs11253177	cg13661397	-0.15	-9.08	5.4e-13
rs7090012	cg13661397	-0.15	-9.08	5.4e-13
rs11239492	cg20848186	0.1	10.19	7.09e-15
rs7912637;rs386743330	cg07678448	-0.13	-10.09	1.07e-14
rs11255057	cg13562929	-0.16	-15.05	2.26e-22
rs1345103	cg14436939	-0.15	-9.94	1.92e-14
rs2698766	cg14436939	-0.15	-9.94	1.92e-14
rs666429	cg04701817	0.1	12.23	3.57e-18
rs1658418	cg12342675	-0.15	-11.21	1.49e-16
rs1890737	cg07678448	-0.13	-10.06	1.18e-14
rs12781451	cg07889765	-0.17	-12.72	6.12e-19
rs2153300	cg11671940	0.22	10.9	4.8e-16
rs7923693	cg19990189	0.11	9.99	1.54e-14
rs4073219	cg24443494	0.18	13.17	1.29e-19
rs10826274	cg07899896	0.18	9.58	7.62e-14
rs12777531	cg13661397	-0.14	-10.56	1.73e-15
rs6537561	cg14436939	-0.15	-9.94	1.92e-14
rs11187869	cg07889765	-0.17	-12.04	7.17e-18
rs1903890	cg04701817	0.1	12.26	3.25e-18
rs7474688	cg12342675	-0.15	-12.63	8.5e-19
rs630051	cg04701817	0.1	11.98	8.9e-18
rs2386635	cg14623216	0.07	10.06	1.16e-14
rs2616636	cg04701817	0.1	12.3	2.75e-18
rs2616637	cg04701817	0.1	12.23	3.57e-18
rs11598095	cg00809775	0.1	8.5	5.42e-12
rs2885755	cg00809775	0.1	8.5	5.42e-12
rs11245367	cg00809775	0.1	8.5	5.42e-12
rs584353	cg04701817	0.1	11.97	9.17e-18
rs12356109	cg20848186	0.1	10.19	7.09e-15
rs11511619	cg20848186	0.1	10.19	7.09e-15
rs10883922	cg01727419	-0.1	-9.62	6.42e-14
rs7901699	cg07899896	0.18	9.08	5.42e-13
rs765173	cg07733920	-0.11	-11.85	1.39e-17
rs11006414	cg07899896	0.18	9.38	1.64e-13
rs7902280	cg10379346	-0.24	-11.26	1.26e-16
rs11598614	cg25423573	0.11	7.78	9.62e-11
rs11001617	cg09553982	-0.16	-10.26	5.54e-15
rs2178285	cg07629776	0.18	11.91	1.12e-17
rs7078822	cg20848186	0.1	9.66	5.52e-14
rs7093687	cg20848186	0.1	9.66	5.52e-14
rs7081004	cg20848186	0.1	9.66	5.52e-14
rs898372	cg23272287	0.19	9.52	9.59e-14
rs7088117	cg07899896	0.18	9.04	6.35e-13
rs10904491	cg13661397	-0.14	-9.95	1.8e-14
rs7478007	cg13661397	-0.14	-9.95	1.8e-14
rs765173	cg19990189	-0.11	-10.59	1.53e-15
rs4244340	cg24179445	-0.11	-13.96	8.34e-21
rs4987105	cg20848186	0.1	9.66	5.52e-14
rs2694765	cg08240913	0.1	7.51	2.86e-10
rs7089805	cg07899896	0.18	9.2	3.38e-13
rs2998286	cg11671940	0.2	11.43	6.53e-17
rs2263102	cg14436939	-0.15	-9.94	1.92e-14
rs284619	cg23272287	0.18	8.77	1.82e-12
rs419515	cg23272287	0.18	8.77	1.82e-12
rs284617	cg23272287	0.18	8.77	1.82e-12
rs7095816	cg19990189	-0.11	-9.59	7.22e-14
rs11002535	cg17067139	0.1	7.83	7.89e-11
rs3845267	cg03955764	-0.12	-11.03	3e-16
rs7072352	cg03955764	-0.12	-11.03	3e-16
rs12413391	cg03955764	-0.12	-11.03	3e-16
rs7098306	cg14458563	0.15	9.88	2.37e-14
rs7098634	cg14458563	0.15	9.88	2.37e-14
rs2780670	cg23656959	0.11	12.21	3.84e-18
rs11001616	cg09553982	-0.16	-10.06	1.18e-14
rs807019	cg17339543	0.02	12.04	7.2e-18
rs2446721	cg23272287	0.19	8.21	1.7e-11
rs1903252	cg23272287	0.19	8.21	1.7e-11
rs1903253	cg23272287	0.19	8.21	1.7e-11
rs1824428	cg23272287	0.19	8.21	1.7e-11
rs2446719	cg23272287	0.19	8.21	1.7e-11
rs9630122	cg13661397	-0.14	-9.95	1.8e-14
rs75251745	cg07570687	0.13	10.21	6.66e-15
rs11197594	cg08240913	0.1	7.36	5.19e-10
rs143694936	cg14458563	0.15	10.15	8.35e-15
rs10795274	cg13661397	-0.14	-9.95	1.8e-14
rs4747595	cg23656959	0.11	12.09	5.83e-18
rs2457851	cg27572370	0.14	10.5	2.17e-15
rs2457850	cg27572370	0.14	10.5	2.17e-15
rs4752322	cg07733920	-0.11	-11.85	1.39e-17
rs10827415	cg20867662	0.11	9.64	6.04e-14
rs7923244	cg20867662	0.11	9.64	6.04e-14
rs11009923	cg20867662	0.11	9.64	6.04e-14
rs1380555	cg23272287	0.18	8.41	7.65e-12
rs10827418	cg20867662	0.11	9.64	6.04e-14
rs10827419	cg20867662	0.11	9.64	6.04e-14
rs796848080;rs10823364;rs61400072	cg23339629	0.09	11.52	4.83e-17
rs4282892	cg14458563	0.15	9.93	1.99e-14
rs7083284	cg14458563	0.15	9.93	1.99e-14
rs7079869	cg14458563	0.15	9.93	1.99e-14
rs2457849	cg27572370	0.15	11.64	3.11e-17
rs10827417	cg20867662	0.11	9.64	6.04e-14
rs10796014	cg14458563	0.15	9.88	2.37e-14
rs10906295	cg14458563	0.15	9.88	2.37e-14
rs185000304	cg14458563	0.15	9.88	2.37e-14
rs139330109	cg14458563	0.15	9.88	2.37e-14
rs2892074	cg14623216	0.07	9.81	3.17e-14
rs11558740	cg07889765	-0.17	-12.04	7.17e-18
rs1890735	cg07678448	-0.13	-10.06	1.18e-14
rs1831188	cg14240646	0.26	9.77	3.63e-14
rs7905578	cg07899896	0.17	9.17	3.79e-13
rs12413018	cg07899896	0.17	9.17	3.79e-13
rs61840961	cg20867662	0.11	9.46	1.24e-13
rs28483914	cg20867662	0.11	9.46	1.24e-13
rs9665365	cg20848186	0.1	9.81	3.09e-14
rs10904036	cg17371064	-0.18	-8.65	3e-12
rs1831187	cg14240646	0.25	9.67	5.41e-14
rs4644560	cg23339629	0.08	11.39	7.59e-17
rs4369300	cg23339629	0.08	11.39	7.59e-17
rs6601969	cg13661397	-0.13	-8.97	8.44e-13
rs1649033	cg12342675	-0.15	-11.38	7.99e-17
rs1649032	cg12342675	-0.15	-11.38	7.99e-17
rs1649030	cg12342675	-0.15	-11.38	7.99e-17
rs1658497	cg12342675	-0.15	-11.38	7.99e-17
rs1658496	cg12342675	-0.15	-11.38	7.99e-17
rs7913021	cg13185377	0.18	11.03	2.99e-16
rs1418540	cg00146027	-0.14	-10.7	1.04e-15
rs2393448	cg12342675	-0.15	-11.2	1.59e-16
rs1649043	cg12342675	-0.15	-11.19	1.63e-16
rs3001717	cg12342675	-0.15	-11.19	1.63e-16
rs2577391	cg12342675	-0.15	-11.19	1.63e-16
rs1658422	cg12342675	-0.15	-11.19	1.63e-16
rs1658421	cg12342675	-0.15	-11.19	1.63e-16
rs1427223	cg12342675	-0.15	-11.19	1.63e-16
rs1427222	cg12342675	-0.15	-11.19	1.63e-16
rs1896243	cg12342675	-0.15	-11.19	1.63e-16
rs10764001	cg20867662	0.11	9.46	1.24e-13
rs10827420	cg20867662	0.11	9.46	1.24e-13
rs9417142	cg20867662	0.11	9.46	1.24e-13
rs1459996	cg07899896	0.18	9.38	1.64e-13
rs200774329	cg12342675	-0.15	-11.19	1.63e-16
rs149675351	cg12342675	-0.15	-11.19	1.63e-16
rs145448523	cg12342675	-0.15	-11.19	1.63e-16
rs1658439	cg12342675	-0.15	-11.19	1.63e-16
rs1649046	cg12342675	-0.15	-11.19	1.63e-16
rs1658435	cg12342675	-0.15	-11.19	1.63e-16
rs12264028	cg12342675	-0.15	-11.19	1.6e-16
rs11239485	cg20848186	0.1	10.2	6.78e-15
rs1649026	cg12342675	-0.15	-11.21	1.53e-16
rs11006170	cg12342675	-0.15	-11.19	1.63e-16
rs7094882	cg12342675	-0.15	-11.19	1.63e-16
rs7098326	cg12342675	-0.15	-11.19	1.63e-16
rs7098329	cg12342675	-0.15	-11.19	1.63e-16
rs2170779	cg12342675	-0.15	-11.19	1.63e-16
rs1365741	cg12342675	-0.15	-11.19	1.63e-16
rs1365740	cg12342675	-0.15	-11.19	1.63e-16
rs12248958	cg12342675	-0.15	-11.19	1.63e-16
rs12242287	cg12342675	-0.15	-11.19	1.63e-16
rs1427196	cg12342675	-0.15	-11.19	1.63e-16
rs1427195	cg12342675	-0.15	-11.19	1.63e-16
rs1649031	cg12342675	-0.15	-11.19	1.63e-16
rs1658494	cg12342675	-0.15	-11.19	1.63e-16
rs1649028	cg12342675	-0.15	-11.19	1.63e-16
rs1649027	cg12342675	-0.15	-11.19	1.63e-16
rs1658492	cg12342675	-0.15	-11.19	1.63e-16
rs1658491	cg12342675	-0.15	-11.19	1.63e-16
rs57396248	cg12342675	-0.15	-11.19	1.63e-16
rs1632584	cg12342675	-0.15	-11.19	1.63e-16
rs1649024	cg12342675	-0.15	-11.19	1.63e-16
rs1630150	cg12342675	-0.15	-11.19	1.63e-16
rs28862452	cg12342675	-0.15	-11.19	1.63e-16
rs145131851	cg12342675	-0.15	-11.19	1.63e-16
rs140448017	cg12342675	-0.15	-11.19	1.63e-16
rs7392584	cg12342675	-0.15	-11.19	1.63e-16
rs7394395	cg12342675	-0.15	-11.19	1.63e-16
rs7392561	cg12342675	-0.15	-11.19	1.63e-16
rs7393610	cg12342675	-0.15	-11.19	1.63e-16
rs7393810	cg12342675	-0.15	-11.19	1.63e-16
rs7393811	cg12342675	-0.15	-11.19	1.63e-16
rs147608004	cg12342675	-0.15	-11.19	1.63e-16
rs145828461	cg12342675	-0.15	-11.19	1.63e-16
rs1649023	cg12342675	-0.15	-11.19	1.63e-16
rs1649022	cg12342675	-0.15	-11.19	1.63e-16
rs1658489	cg12342675	-0.15	-11.19	1.63e-16
rs1649021	cg12342675	-0.15	-11.19	1.63e-16
rs2577393	cg12342675	-0.15	-11.19	1.63e-16
rs9416704	cg12342675	-0.15	-11.19	1.63e-16
rs9416705	cg12342675	-0.15	-11.19	1.63e-16
rs1658488	cg12342675	-0.15	-11.19	1.63e-16
rs1346300	cg12342675	-0.15	-11.19	1.63e-16
rs1658486	cg12342675	-0.15	-11.19	1.63e-16
rs1649019	cg12342675	-0.15	-11.19	1.63e-16
rs1649018	cg12342675	-0.15	-11.19	1.63e-16
rs1658485	cg12342675	-0.15	-11.19	1.63e-16
rs1649017	cg12342675	-0.15	-11.19	1.63e-16
rs1649016	cg12342675	-0.15	-11.19	1.63e-16
rs1658484	cg12342675	-0.15	-11.19	1.63e-16
rs1658483	cg12342675	-0.15	-11.19	1.63e-16
rs1649015	cg12342675	-0.15	-11.19	1.63e-16
rs1658481	cg12342675	-0.15	-11.19	1.63e-16
rs1658478	cg12342675	-0.15	-11.19	1.63e-16
rs1658477	cg12342675	-0.15	-11.19	1.63e-16
rs1649089	cg12342675	-0.15	-11.19	1.63e-16
rs1427224	cg12342675	-0.15	-11.19	1.63e-16
rs1593678	cg12342675	-0.15	-11.19	1.63e-16
rs1593677	cg12342675	-0.15	-11.19	1.63e-16
rs1593675	cg12342675	-0.15	-11.19	1.63e-16
rs1593674	cg12342675	-0.15	-11.19	1.63e-16
rs1658471	cg12342675	-0.15	-11.19	1.63e-16
rs1649085	cg12342675	-0.15	-11.19	1.63e-16
rs1649084	cg12342675	-0.15	-11.19	1.63e-16
rs1658470	cg12342675	-0.15	-11.19	1.63e-16
rs1658468	cg12342675	-0.15	-11.19	1.63e-16
rs1649080	cg12342675	-0.15	-11.19	1.63e-16
rs1649077	cg12342675	-0.15	-11.19	1.63e-16
rs1649076	cg12342675	-0.15	-11.19	1.63e-16
rs1593673	cg12342675	-0.15	-11.19	1.63e-16
rs1579394	cg12342675	-0.15	-11.19	1.63e-16
rs1626532	cg12342675	-0.15	-11.19	1.63e-16
rs1658467	cg12342675	-0.15	-11.19	1.63e-16
rs1593671	cg12342675	-0.15	-11.19	1.63e-16
rs1582827	cg12342675	-0.15	-11.19	1.63e-16
rs1582826	cg12342675	-0.15	-11.19	1.63e-16
rs1649072	cg12342675	-0.15	-11.19	1.63e-16
rs1658463	cg12342675	-0.15	-11.19	1.63e-16
rs1658462	cg12342675	-0.15	-11.19	1.63e-16
rs1303970	cg12342675	-0.15	-11.19	1.63e-16
rs1303968	cg12342675	-0.15	-11.19	1.63e-16
rs1593670	cg12342675	-0.15	-11.19	1.63e-16
rs1658458	cg12342675	-0.15	-11.19	1.63e-16
rs1658457	cg12342675	-0.15	-11.19	1.63e-16
rs1649069	cg12342675	-0.15	-11.19	1.63e-16
rs1649067	cg12342675	-0.15	-11.19	1.63e-16
rs1649066	cg12342675	-0.15	-11.19	1.63e-16
rs1658455	cg12342675	-0.15	-11.19	1.63e-16
rs1649065	cg12342675	-0.15	-11.19	1.63e-16
rs1658454	cg12342675	-0.15	-11.19	1.63e-16
rs1614258	cg12342675	-0.15	-11.19	1.63e-16
rs1649063	cg12342675	-0.15	-11.19	1.63e-16
rs1649062	cg12342675	-0.15	-11.19	1.63e-16
rs1658453	cg12342675	-0.15	-11.19	1.63e-16
rs1649061	cg12342675	-0.15	-11.19	1.63e-16
rs1658452	cg12342675	-0.15	-11.19	1.63e-16
rs1658447	cg12342675	-0.15	-11.19	1.63e-16
rs1658446	cg12342675	-0.15	-11.19	1.63e-16
rs2438182	cg12342675	-0.15	-11.19	1.63e-16
rs1658443	cg12342675	-0.15	-11.19	1.63e-16
rs1649058	cg12342675	-0.15	-11.19	1.63e-16
rs1649057	cg12342675	-0.15	-11.19	1.63e-16
rs1158212	cg12342675	-0.15	-11.19	1.63e-16
rs1658417	cg12342675	-0.15	-11.21	1.49e-16
rs1658459	cg12342675	-0.15	-11.19	1.63e-16
rs1621227	cg12342675	-0.15	-11.19	1.63e-16
rs1620404	cg12342675	-0.15	-11.19	1.63e-16
rs1626606	cg12342675	-0.15	-11.19	1.63e-16
rs1649042	cg12342675	-0.15	-11.19	1.63e-16
rs1649041	cg12342675	-0.15	-11.19	1.63e-16
rs1658432	cg12342675	-0.15	-11.19	1.63e-16
rs2917949	cg12342675	-0.15	-11.19	1.63e-16
rs2577392	cg12342675	-0.15	-11.19	1.63e-16
rs2842083	cg12342675	-0.15	-11.19	1.63e-16
rs1658431	cg12342675	-0.15	-11.19	1.63e-16
rs1649040	cg12342675	-0.15	-11.19	1.63e-16
rs1649039	cg12342675	-0.15	-11.19	1.63e-16
rs1658429	cg12342675	-0.15	-11.19	1.63e-16
rs1649038	cg12342675	-0.15	-11.19	1.63e-16
rs1658428	cg12342675	-0.15	-11.19	1.63e-16
rs1649037	cg12342675	-0.15	-11.19	1.63e-16
rs1658427	cg12342675	-0.15	-11.19	1.63e-16
rs1658426	cg12342675	-0.15	-11.19	1.63e-16
rs1658424	cg12342675	-0.15	-11.19	1.63e-16
rs1649036	cg12342675	-0.15	-11.19	1.63e-16
rs1658420	cg12342675	-0.15	-11.19	1.63e-16
rs1649035	cg12342675	-0.15	-11.19	1.63e-16
rs1658419	cg12342675	-0.15	-11.19	1.63e-16
rs1649082	cg12342675	-0.15	-11.19	1.63e-16
rs1649081	cg12342675	-0.15	-11.19	1.63e-16
rs827321	cg13398715	-0.16	-18.18	1.58e-26
rs7074778	cg12342675	-0.15	-11.17	1.74e-16
rs7072034	cg00146027	-0.14	-10.58	1.62e-15
rs1649051	cg12342675	-0.15	-11.19	1.63e-16
rs1658441	cg12342675	-0.15	-11.19	1.63e-16
rs1658440	cg12342675	-0.15	-11.19	1.63e-16
rs1649049	cg12342675	-0.15	-11.19	1.63e-16
rs11815274	cg12342675	-0.15	-11.19	1.63e-16
rs1658480	cg12342675	-0.15	-11.19	1.63e-16
rs1658479	cg12342675	-0.15	-11.19	1.63e-16
rs7087361	cg17067139	0.1	7.83	7.89e-11
rs4979970	cg17067139	0.1	7.83	7.89e-11
rs7920428	cg17067139	0.1	7.83	7.89e-11
rs2007833	cg17067139	0.1	7.83	7.89e-11
rs12355942	cg07570687	0.14	10.46	2.57e-15
rs11009173	cg00146027	-0.14	-12.37	2.18e-18
rs10823361	cg23339629	0.08	10.5	2.21e-15
rs1549797	cg23339629	0.08	10.5	2.21e-15
rs2393534	cg23272287	0.17	7.97	4.52e-11
rs10763599	cg23272287	0.17	7.97	4.52e-11
rs10824607	cg17067139	0.11	8.95	9.12e-13
rs9417143	cg20867662	0.11	9.53	9.39e-14
rs10884001	cg01780345	-0.24	-11.61	3.43e-17
rs2698767	cg14436939	-0.14	-9.01	7.06e-13
rs9418115	cg20867662	0.11	9.46	1.24e-13
rs9417140	cg20867662	0.11	9.46	1.24e-13
rs1459995	cg07899896	0.18	9.12	4.62e-13
rs2783434	cg07158320	-0.25	-15.69	2.9e-23
rs1749851	cg18737081	-0.11	-10.86	5.49e-16
rs56180358	cg20848186	0.1	9.66	5.52e-14
rs4752322	cg19990189	-0.11	-10.59	1.53e-15
rs7893218	cg13185377	0.18	11.03	2.99e-16
rs7908527	cg23272287	0.18	8.02	3.6e-11
rs4508155	cg23272287	0.18	8.02	3.6e-11
rs10509099	cg23272287	0.18	8.02	3.6e-11
rs10824606	cg17067139	0.11	8.95	9.12e-13
rs4752562	cg07044115	-0.25	-12.01	7.81e-18
rs10732789	cg24179445	-0.11	-14.14	4.61e-21
rs9418116	cg20867662	0.11	9.46	1.24e-13
rs2446575	cg27572370	0.15	11.64	3.1e-17
rs11511620	cg20848186	0.1	9.54	9e-14
rs35039157	cg06406458	-0.32	-12.62	8.95e-19
rs9418810	cg06406458	-0.32	-12.62	8.95e-19
rs9418811	cg06406458	-0.32	-12.62	8.95e-19
rs2066161	cg06406458	-0.32	-12.62	8.95e-19
rs2066160	cg06406458	-0.32	-12.62	8.95e-19
rs2386633	cg14623216	0.07	9.22	3.11e-13
rs7097037	cg11519256	0.02	9.34	1.98e-13
rs7085382	cg11519256	0.02	9.34	1.98e-13
rs7908665	cg07733920	-0.11	-10.65	1.23e-15
rs4751475	cg19572051	-0.2	-12.58	1.01e-18
rs9418816	cg19572051	-0.2	-12.58	1.01e-18
rs2447633	cg04701817	0.1	12.15	4.69e-18
rs998334	cg04701817	0.1	12.15	4.69e-18
rs7908665	cg19990189	-0.1	-9.86	2.59e-14
rs7897782	cg24179445	-0.11	-14.14	4.61e-21
rs4403743	cg24179445	-0.11	-13.96	8.34e-21
rs6584392	cg24179445	-0.11	-13.96	8.34e-21
rs6584393	cg24179445	-0.11	-13.96	8.34e-21
rs6584394	cg24179445	-0.11	-13.96	8.34e-21
rs6584395	cg24179445	-0.11	-13.96	8.34e-21
rs4917907	cg24179445	-0.11	-13.96	8.34e-21
rs4277047	cg24179445	-0.11	-13.96	8.34e-21
rs4509693	cg24179445	-0.11	-13.96	8.34e-21
rs10748797	cg24179445	-0.11	-13.96	8.34e-21
rs4917908	cg24179445	-0.11	-13.96	8.34e-21
rs2446574	cg27572370	0.14	10.5	2.17e-15
rs17424847	cg13562929	-0.16	-15.27	1.1e-22
rs1649059	cg12342675	-0.15	-11.19	1.63e-16
rs2420936	cg08195415	0.12	9.79	3.34e-14
rs2386635	cg11519256	0.02	9.34	1.98e-13
rs11006413	cg07899896	0.17	8.87	1.23e-12
rs1556383	cg14812524	0.14	11.22	1.44e-16
rs55896038	cg08195415	0.12	9.79	3.34e-14
rs7091556	cg08195415	0.12	9.79	3.34e-14
rs368317053;rs67946394;rs1649088;rs67222408;rs551217760;rs796804623	cg12342675	-0.15	-11.05	2.77e-16
rs7915348	cg17371064	-0.18	-8.65	3e-12
rs4752560	cg07044115	-0.25	-11.96	9.39e-18
rs1343005	cg07629776	0.17	11.58	3.83e-17
rs35039157	cg19572051	-0.19	-11.9	1.19e-17
rs9418810	cg19572051	-0.19	-11.9	1.19e-17
rs9418811	cg19572051	-0.19	-11.9	1.19e-17
rs2066161	cg19572051	-0.19	-11.9	1.19e-17
rs2066160	cg19572051	-0.19	-11.9	1.19e-17
rs3814204	cg14623216	0.07	8.22	1.64e-11
rs1896246	cg12342675	-0.15	-10.66	1.2e-15
rs1896245	cg12342675	-0.15	-10.66	1.2e-15
rs73576221	cg13185377	0.19	9.57	7.99e-14
rs1658434	cg12342675	-0.15	-10.75	8.62e-16
rs816651	cg23027329	-0.1	-10.08	1.11e-14
rs898373	cg07899896	0.18	10.42	2.93e-15
rs11819163	cg07899896	0.18	10.42	2.93e-15
rs10901827	cg00809775	0.1	8.5	5.42e-12
rs11597901	cg00809775	0.1	8.5	5.42e-12
rs2440866	cg23272287	0.18	7.92	5.45e-11
rs2800396	cg14240646	0.25	9.67	5.41e-14
rs606682	cg04701817	0.1	12.93	2.99e-19
rs1658456	cg12342675	-0.15	-11.19	1.63e-16
rs7901687	cg23272287	0.19	8.23	1.56e-11
rs4752560	cg19650936	0.12	9.98	1.61e-14
rs7084967	cg23272287	0.18	8.08	2.92e-11
rs1649091	cg12342675	-0.15	-11.19	1.63e-16
rs4752562	cg19650936	0.12	9.93	1.98e-14
rs11257391	cg21322043	0.33	11.66	2.88e-17
rs1658438	cg12342675	-0.15	-10.7	1.03e-15
rs17663446	cg07356745	0.27	10.54	1.88e-15
rs61281038	cg20867662	0.11	9	7.35e-13
rs942794	cg06073814	0.13	8.5	5.45e-12
rs3862877	cg03955764	-0.12	-12.43	1.71e-18
rs7923293	cg03955764	-0.12	-12.43	1.71e-18
rs9423897	cg14623216	0.07	9.14	4.22e-13
rs4948655	cg03955764	-0.12	-12.43	1.71e-18
rs11200264	cg09943237	0.06	8.94	9.41e-13
rs7392591	cg12342675	-0.15	-11.19	1.63e-16
rs10762385	cg20418394	0.15	11.36	8.56e-17
rs11253064	cg13185377	0.18	10.62	1.39e-15
rs7907837	cg07733920	-0.11	-10.65	1.23e-15
rs141938292	cg23272287	0.18	7.95	4.77e-11
rs2452512	cg23272287	0.18	8.12	2.49e-11
rs1278329	cg15342452	0.09	11.55	4.25e-17
rs2800405	cg14240646	0.25	9.67	5.41e-14
rs2800401	cg14240646	0.25	9.67	5.41e-14
rs2800398	cg14240646	0.25	9.67	5.41e-14
rs2780671	cg14240646	0.25	9.67	5.41e-14
rs17531317	cg14240646	0.25	9.67	5.41e-14
rs372705329;rs17531324;rs370944053	cg14240646	0.25	9.67	5.41e-14
rs2800395	cg14240646	0.25	9.67	5.41e-14
rs1780090	cg14240646	0.25	9.67	5.41e-14
rs1780093	cg14240646	0.25	9.67	5.41e-14
rs2797079	cg14240646	0.25	9.67	5.41e-14
rs2800393	cg14240646	0.25	9.67	5.41e-14
rs2800391	cg14240646	0.25	9.67	5.41e-14
rs7917207	cg14240646	0.25	9.67	5.41e-14
rs7914155	cg14240646	0.25	9.67	5.41e-14
rs2780665	cg14240646	0.25	9.67	5.41e-14
rs2770201	cg14240646	0.25	9.67	5.41e-14
rs2770200	cg14240646	0.25	9.67	5.41e-14
rs55978138	cg20848186	0.1	9.65	5.75e-14
rs1649068	cg12342675	-0.15	-11.23	1.4e-16
rs2251968	cg23272287	0.18	7.93	5.2e-11
rs2577382	cg08240913	0.1	7.51	2.86e-10
rs6593460	cg03955764	-0.12	-12.43	1.71e-18
rs7907374	cg03955764	-0.12	-12.43	1.71e-18
rs11253156	cg13661397	-0.13	-9.17	3.74e-13
rs2797860	cg07629776	0.18	12.05	6.82e-18
rs1649025	cg12342675	-0.15	-11.19	1.63e-16
rs1658490	cg12342675	-0.15	-11.19	1.63e-16
rs2386630	cg14623216	0.07	9.14	4.22e-13
rs2386629	cg14623216	0.07	9.14	4.22e-13
rs2386627	cg14623216	0.07	9.14	4.22e-13
rs2436569	cg23272287	0.18	7.86	6.79e-11
rs2436566	cg23272287	0.18	7.86	6.79e-11
rs3827681	cg14436939	-0.15	-11.68	2.64e-17
rs34422972	cg05119883	0.22	10.93	4.25e-16
rs10824686	cg05119883	0.22	10.93	4.25e-16
rs2802370	cg06073814	0.13	8.53	4.75e-12
rs7080530	cg23027329	-0.1	-10.48	2.38e-15
rs10823552	cg20418394	0.15	11.36	8.56e-17
rs1658493	cg12342675	-0.15	-11.19	1.63e-16
rs4751475	cg06406458	-0.32	-13.25	9.63e-20
rs9418816	cg06406458	-0.32	-13.25	9.63e-20
rs6601957	cg13661397	-0.13	-9.03	6.55e-13
rs12267435	cg23272287	0.18	8.18	1.96e-11
rs4919486	cg24179445	-0.11	-14.14	4.61e-21
rs7914169	cg24179445	-0.11	-14.14	4.61e-21
rs10736999	cg13661397	-0.14	-8.77	1.87e-12
rs10904506	cg13661397	-0.14	-8.77	1.87e-12
rs944909	cg14240646	0.25	9.67	5.41e-14
rs1658460	cg12342675	-0.15	-11.19	1.63e-16
rs10904035	cg17371064	-0.19	-8.94	9.6e-13
rs945798	cg17371064	-0.18	-8.65	3e-12
rs4752562	cg25052156	-0.18	-12	8.18e-18
rs4752560	cg25052156	-0.18	-12	8.06e-18
rs2783614	cg07158320	-0.23	-12.4	1.95e-18
rs7099997	cg07245057	0.15	6.87	3.59e-09
rs7101132	cg07245057	0.15	6.87	3.59e-09
rs10901803	cg00809775	0.1	7.03	1.91e-09
rs4934658	cg20867662	0.12	10.06	1.2e-14
rs4934666	cg20867662	0.12	10.06	1.2e-14
rs4934667	cg20867662	0.12	10.06	1.2e-14
rs55965812	cg20848186	0.1	9.66	5.52e-14
rs12354712	cg20848186	0.1	9.66	5.52e-14
rs10796012	cg14458563	0.15	9.88	2.37e-14
rs10796013	cg14458563	0.15	9.88	2.37e-14
rs2790766	cg06073814	0.13	8.5	5.45e-12
rs12570087	cg08240913	0.1	7.08	1.55e-09
rs16935717	cg20867662	0.11	9.22	3.13e-13
rs1549799	cg23339629	0.08	10.5	2.21e-15
rs7071102	cg23272287	0.18	7.93	5.28e-11
rs2452518	cg07899896	0.18	9.32	2.15e-13
rs7089977	cg00146027	-0.14	-10.78	7.62e-16
rs55813610	cg23771949	-0.16	-11.68	2.59e-17
rs4546989	cg14623216	0.07	9.14	4.22e-13
rs11258391	cg14623216	0.07	9.14	4.22e-13
rs4592326	cg14623216	0.07	9.14	4.22e-13
rs9423896	cg14623216	0.07	9.14	4.22e-13
rs7090709	cg13661397	-0.14	-8.77	1.87e-12
rs77538812	cg14458563	0.15	10.15	8.35e-15
rs12259731	cg20673407	-0.36	-9.08	5.34e-13
rs11009925	cg20867662	0.11	9.22	3.13e-13
rs10752012	cg13661397	-0.14	-8.77	1.87e-12
rs11791	cg13661397	-0.14	-8.77	1.87e-12
rs2452522	cg23272287	0.18	7.95	4.77e-11
rs2489374	cg14240646	0.25	9.67	5.41e-14
rs4948949	cg03955764	-0.12	-11.68	2.63e-17
rs4948950	cg03955764	-0.12	-11.68	2.63e-17
rs7080176	cg20867662	0.12	9.8	3.29e-14
rs7081164	cg11124823	-0.06	-7.85	7.19e-11
rs7092394	cg11124823	-0.06	-7.85	7.19e-11
rs12219032	cg11124823	-0.06	-7.85	7.19e-11
rs12217395	cg11124823	-0.06	-7.85	7.19e-11
rs12411782	cg11124823	-0.06	-7.85	7.19e-11
rs9418712	cg06406458	-0.28	-10.88	5.22e-16
rs11018215	cg06406458	-0.28	-10.88	5.22e-16
rs4751425	cg06406458	-0.28	-10.88	5.22e-16
rs10763999	cg20867662	0.12	8.77	1.86e-12
rs10764000	cg20867662	0.12	8.77	1.86e-12
rs2921273	cg23272287	0.18	8.08	2.92e-11
rs10762385	cg01464515	0.09	11.49	5.33e-17
rs9416703	cg12342675	-0.15	-11.19	1.63e-16
rs2892074	cg11519256	0.02	8.81	1.56e-12
rs2420936	cg25409939	0.11	8.74	2.05e-12
rs4582866	cg14458563	0.15	9.93	1.99e-14
rs7079763	cg14458563	0.15	9.93	1.99e-14
rs3824613	cg20848186	0.1	7.4	4.27e-10
rs10752282	cg14458563	0.15	9.88	2.37e-14
rs10752283	cg14458563	0.15	9.88	2.37e-14
rs10796016	cg14458563	0.15	9.88	2.37e-14
rs10906296	cg14458563	0.15	9.88	2.37e-14
rs2800394	cg14240646	0.25	9.25	2.79e-13
rs55896038	cg25409939	0.11	8.74	2.05e-12
rs7091556	cg25409939	0.11	8.74	2.05e-12
rs75344773	cg07356745	0.25	9.54	8.87e-14
rs56178329	cg11519256	0.02	9.19	3.46e-13
rs3814203	cg11519256	0.02	9.19	3.46e-13
rs3814202	cg11519256	0.02	9.19	3.46e-13
rs5019339	cg11519256	0.02	9.19	3.46e-13
rs5019340	cg11519256	0.02	9.19	3.46e-13
rs200200172	cg11124823	-0.06	-7.85	7.19e-11
rs28397083	cg11124823	-0.06	-7.85	7.19e-11
rs28433331	cg11124823	-0.06	-7.85	7.19e-11
rs2393537	cg23272287	0.18	8.56	4.28e-12
rs10885620	cg23260525	-0.1	-9.18	3.68e-13
rs7902970	cg21641816	-0.09	-14.97	2.97e-22
rs12776163	cg14418922	-0.19	-12.81	4.47e-19
rs10751373	cg03955764	-0.12	-12.43	1.71e-18
rs17531310	cg14240646	0.25	9.45	1.25e-13
rs7075610	cg17067139	0.1	6.83	4.2e-09
rs12411806	cg11124823	-0.06	-7.85	7.19e-11
rs72644229	cg11124823	-0.06	-7.85	7.19e-11
rs201032138	cg11124823	-0.06	-7.85	7.19e-11
rs202048864	cg11124823	-0.06	-7.85	7.19e-11
rs201880683	cg11124823	-0.06	-7.85	7.19e-11
rs10904037	cg17371064	-0.18	-8.65	3e-12
rs3814201	cg14623216	0.07	9.61	6.66e-14
rs2446721	cg25172127	0.12	9.81	3.07e-14
rs1903252	cg25172127	0.12	9.81	3.07e-14
rs1903253	cg25172127	0.12	9.81	3.07e-14
rs1824428	cg25172127	0.12	9.81	3.07e-14
rs2446719	cg25172127	0.12	9.81	3.07e-14
rs3855868	cg03955764	-0.11	-10.84	5.98e-16
rs7477459	cg07899896	0.18	9.61	6.66e-14
rs36147985	cg12342675	-0.15	-10.26	5.55e-15
rs36151114	cg12342675	-0.15	-10.26	5.55e-15
rs77582167	cg12342675	-0.15	-10.26	5.55e-15
rs9424181	cg14623216	0.07	9.14	4.22e-13
rs9423901	cg14623216	0.07	9.14	4.22e-13
rs7923640	cg14623216	0.07	9.14	4.22e-13
rs13377143	cg23272287	0.18	8.7	2.42e-12
rs59747214	cg23272287	0.18	8.7	2.42e-12
rs1563824	cg23272287	0.18	8.7	2.42e-12
rs7905293	cg23272287	0.18	8.7	2.42e-12
rs7895023	cg14418922	-0.19	-12.85	3.89e-19
rs73574227	cg13185377	0.18	9.59	7.44e-14
rs28496118	cg13563815	0.15	10.14	8.62e-15
rs10047354	cg07899896	0.19	9.65	5.75e-14
rs58238740	cg20848186	0.1	7.4	4.27e-10
rs3780894	cg20848186	0.1	7.4	4.27e-10
rs3780895	cg20848186	0.1	7.4	4.27e-10
rs2310776	cg20848186	0.1	7.4	4.27e-10
rs17157736	cg20848186	0.1	7.4	4.27e-10
rs7077891	cg20848186	0.1	7.4	4.27e-10
rs10823552	cg01464515	0.09	11.49	5.33e-17
rs3780896	cg20848186	0.1	7.34	5.54e-10
rs3780897	cg20848186	0.1	7.34	5.54e-10
rs2802371	cg06073814	0.13	8.53	4.75e-12
rs9418800	cg06406458	-0.28	-10.88	5.22e-16
rs113690919	cg23339629	0.08	9.91	2.09e-14
rs11009924	cg20867662	0.11	9.22	3.13e-13
rs10508813	cg20867662	0.12	8.77	1.86e-12
rs7895074	cg20867662	0.12	8.77	1.86e-12
rs7080443	cg03955764	-0.12	-11.53	4.62e-17
rs284621	cg23272287	0.18	8.44	6.88e-12
rs61865052	cg07356745	0.25	9.81	3.12e-14
rs56809248	cg07356745	0.25	9.81	3.12e-14
rs11202291	cg11124823	-0.05	-7.58	2.12e-10
rs16935716	cg20867662	0.12	8.6	3.61e-12
rs7907837	cg19990189	-0.1	-9.86	2.59e-14
rs4934016	cg07356745	0.25	9.81	3.12e-14
rs61866490	cg07356745	0.25	9.81	3.12e-14
rs61866493	cg07356745	0.25	9.81	3.12e-14
rs11201049	cg07356745	0.25	9.81	3.12e-14
rs11201050	cg07356745	0.25	9.81	3.12e-14
rs58620606	cg07356745	0.25	9.81	3.12e-14
rs61866495	cg07356745	0.25	9.81	3.12e-14
rs17719302	cg07356745	0.25	9.81	3.12e-14
rs61866506	cg07356745	0.25	9.81	3.12e-14
rs4934021	cg07356745	0.25	9.81	3.12e-14
rs200633850;rs373297316;rs544053516	cg20848186	0.1	10.23	6.05e-15
rs34738037	cg13562929	-0.16	-15.25	1.17e-22
rs12413778	cg20867662	0.12	8.6	3.61e-12
rs2178286	cg07629776	0.18	11.86	1.34e-17
rs6585266	cg04701817	0.1	10.96	3.87e-16
rs11202294	cg11124823	-0.05	-7.66	1.51e-10
rs1619284	cg12342675	-0.15	-11.19	1.63e-16
rs11200264	cg20835665	0.07	11.22	1.46e-16
rs7918409	cg06791446	0.18	11.1	2.26e-16
rs7076936	cg11519256	0.02	9.34	1.98e-13
rs60097806	cg21641816	-0.09	-14.97	2.97e-22
rs12774369	cg20848186	0.1	7.4	4.27e-10
rs60842538	cg20848186	0.1	7.34	5.54e-10
rs3780899	cg20848186	0.1	7.34	5.54e-10
rs1106478	cg06406458	-0.32	-11.85	1.44e-17
rs10823362	cg23339629	0.08	9.61	6.82e-14
rs9418712	cg19572051	-0.17	-10.55	1.84e-15
rs11018215	cg19572051	-0.17	-10.55	1.84e-15
rs4751425	cg19572051	-0.17	-10.55	1.84e-15
rs2446718	cg25172127	0.12	9.81	3.07e-14
rs2446722	cg25172127	0.12	9.81	3.07e-14
rs1459990	cg25172127	0.12	9.81	3.07e-14
rs112801076	cg00809775	0.1	7.43	3.81e-10
rs11595766	cg07356745	0.25	9.54	8.87e-14
rs11596916	cg07356745	0.25	9.54	8.87e-14
rs4752562	cg06791446	-0.19	-12.46	1.55e-18
rs10736973	cg17371064	-0.18	-8.65	3e-12
rs10786606	cg24179445	-0.11	-13.96	8.34e-21
rs2780680	cg14240646	0.25	9.67	5.41e-14
rs2780679	cg14240646	0.25	9.67	5.41e-14
rs9423902	cg14623216	0.07	8.74	2.09e-12
rs4752560	cg06791446	-0.19	-12.47	1.51e-18
rs11252919	cg13185377	0.17	9.49	1.08e-13
rs2386638	cg11519256	0.02	9.19	3.46e-13
rs2386637	cg11519256	0.02	9.19	3.46e-13
rs2892076	cg11519256	0.02	9.19	3.46e-13
rs2892075	cg11519256	0.02	9.19	3.46e-13
rs3763698	cg11519256	0.02	9.19	3.46e-13
rs10904488	cg13661397	-0.14	-10.57	1.66e-15
rs7918409	cg25052156	0.17	11.6	3.6e-17
rs7086123	cg20867662	0.11	8.69	2.53e-12
rs3814204	cg11519256	0.03	9.43	1.38e-13
rs987059	cg07899896	0.18	8.97	8.49e-13
rs1563822	cg25172127	0.11	10.13	9.03e-15
rs71481711	cg13562929	-0.16	-15.25	1.17e-22
rs186361595	cg07899896	0.18	9.12	4.66e-13
rs10900167	cg03955764	-0.12	-12.43	1.71e-18
rs9424166	cg14623216	0.07	8.04	3.42e-11
rs2446718	cg23272287	0.19	8.21	1.7e-11
rs2446722	cg23272287	0.19	8.21	1.7e-11
rs1459990	cg23272287	0.19	8.21	1.7e-11
rs28607366	cg13563815	0.14	8.95	9.2e-13
rs4630198	cg13661397	-0.13	-7.66	1.52e-10
rs4424575	cg13661397	-0.13	-7.66	1.52e-10
rs4948952	cg03955764	-0.12	-12.43	1.71e-18
rs10751372	cg03955764	-0.12	-12.43	1.71e-18
rs4747595	cg14240646	0.25	9.67	5.41e-14
rs7901687	cg25172127	0.12	9.79	3.37e-14
rs11252689	cg21641816	-0.09	-14.97	2.97e-22
rs2780670	cg14240646	0.25	9.45	1.25e-13
rs1548085	cg23272287	0.19	9.52	9.59e-14
rs1658469	cg12342675	-0.15	-10.11	9.84e-15
rs9418800	cg19572051	-0.17	-10.55	1.84e-15
rs672785	cg22923514	-0.09	-10.2	6.96e-15
rs1171602	cg12084908	0.13	10.74	8.79e-16
rs76394459	cg14623216	0.07	8.04	3.42e-11
rs1621280	cg23027329	-0.1	-10.29	4.9e-15
rs816650	cg13185377	0.18	11.15	1.87e-16
rs1171600	cg12084908	0.12	10.11	9.89e-15
rs3001713	cg12342675	-0.15	-11.2	1.54e-16
rs28426375	cg12342675	-0.15	-11.2	1.54e-16
rs3001714	cg12342675	-0.15	-11.2	1.54e-16
rs3001715	cg12342675	-0.15	-11.2	1.54e-16
rs1649034	cg12342675	-0.15	-10.27	5.19e-15
rs1896244	cg12342675	-0.15	-10.11	9.84e-15
rs7097576	cg12342675	-0.15	-10.11	9.84e-15
rs7098606	cg12342675	-0.15	-10.11	9.84e-15
rs1658495	cg12342675	-0.15	-10.11	9.84e-15
rs2917950	cg12342675	-0.15	-10.11	9.84e-15
rs1593672	cg12342675	-0.15	-10.11	9.84e-15
rs1649074	cg12342675	-0.15	-10.11	9.84e-15
rs1658451	cg12342675	-0.15	-10.11	9.84e-15
rs1658448	cg12342675	-0.15	-10.11	9.84e-15
rs1620186	cg12342675	-0.15	-10.11	9.84e-15
rs1658442	cg12342675	-0.15	-10.11	9.84e-15
rs1649055	cg12342675	-0.15	-10.11	9.84e-15
rs11190533	cg07570687	0.14	10.85	5.79e-16
rs11190534	cg07570687	0.14	10.85	5.79e-16
rs35508946	cg07570687	0.14	10.85	5.79e-16
rs76629555	cg07570687	0.14	10.85	5.79e-16
rs7076606	cg07570687	0.14	10.85	5.79e-16
rs2748434	cg26810230	-0.1	-11.85	1.42e-17
rs4752256	cg23260525	-0.1	-8.99	7.7e-13
rs1924034	cg23260525	-0.1	-8.99	7.7e-13
rs2181124	cg02220105	0.09	12.66	7.63e-19
rs11819634	cg02220105	0.08	11.69	2.55e-17
rs7918409	cg08899523	-0.21	-11.17	1.72e-16
rs76835764	cg07570687	0.14	10.85	5.79e-16
rs77769532	cg07570687	0.14	10.85	5.79e-16
rs1623568	cg12342675	-0.15	-10.11	9.84e-15
rs1621811	cg12342675	-0.15	-10.11	9.84e-15
rs1649048	cg12342675	-0.15	-10.11	9.84e-15
rs7477292;rs386740359	cg13661397	-0.14	-10.59	1.57e-15
rs200166301	cg11124823	-0.05	-7.32	6.01e-10
rs1177697	cg12084908	0.12	10.04	1.26e-14
rs4313486	cg08344422	0.16	11.09	2.33e-16
rs10829375	cg08344422	0.16	11.09	2.33e-16
rs2489403	cg08344422	0.16	11.09	2.33e-16
rs2483857	cg08344422	0.16	11.09	2.33e-16
rs2483858	cg08344422	0.16	11.09	2.33e-16
rs2806444	cg26810230	-0.1	-11.68	2.62e-17
rs370232405	cg20848186	0.1	9.66	5.52e-14
rs1649092	cg12342675	-0.15	-10.11	9.84e-15
rs1346301	cg12342675	-0.15	-9.92	2.06e-14
rs1427204	cg12342675	-0.15	-9.92	2.06e-14
rs1380555	cg25172127	0.11	9.33	2.01e-13
rs2504012	cg00146027	-0.13	-9.55	8.71e-14
rs2420936	cg22633036	-0.15	-8.17	2.04e-11
rs660101	cg04701817	0.1	12.58	1.01e-18
rs1832575	cg03955764	-0.12	-11.68	2.63e-17
rs11257392	cg21322043	0.31	11.34	9.19e-17
rs1106478	cg19572051	-0.19	-10.72	9.51e-16
rs9424166	cg11519256	0.03	9.6	6.92e-14
rs2495740	cg16342193	-0.06	-7.78	9.71e-11
rs6601958	cg13661397	-0.14	-9.73	4.24e-14
rs9423905	cg14623216	0.07	8.35	9.93e-12
rs1418738	cg14623216	0.07	8.35	9.93e-12
rs1418737	cg14623216	0.07	8.35	9.93e-12
rs9424182	cg14623216	0.07	8.35	9.93e-12
rs10887025	cg07444487	0.19	12.05	6.92e-18
rs10749436	cg07444487	0.19	12.05	6.92e-18
rs75474563	cg11519256	0.02	8.59	3.84e-12
rs7916904	cg07570687	0.13	10.23	6.04e-15
rs55896038	cg22633036	-0.15	-8.17	2.04e-11
rs7091556	cg22633036	-0.15	-8.17	2.04e-11
rs1334596	cg10751070	0.11	8.43	7.06e-12
rs1649045	cg12342675	-0.15	-9.84	2.75e-14
rs377007525	cg11124823	-0.05	-7.58	2.12e-10
rs201017788	cg11124823	-0.05	-7.58	2.12e-10
rs201640211	cg11124823	-0.05	-7.58	2.12e-10
rs201207646	cg11124823	-0.05	-7.37	4.88e-10
rs4948951	cg03955764	-0.12	-11.68	2.63e-17
rs4948656	cg03955764	-0.12	-11.68	2.63e-17
rs12415640	cg03955764	-0.12	-11.68	2.63e-17
rs7083111	cg20848186	0.1	8.72	2.22e-12
rs284624	cg25172127	0.11	9.39	1.6e-13
rs284622	cg25172127	0.11	9.39	1.6e-13
rs7918409	cg07044115	0.23	10.87	5.38e-16
rs2495739	cg16342193	-0.06	-7.59	2.01e-10
rs7902034	cg23656959	0.1	11.88	1.25e-17
rs2789675	cg11124823	-0.05	-7.44	3.77e-10
rs117261594	cg11124823	-0.05	-7.37	4.88e-10
rs201371884	cg11124823	-0.05	-7.37	4.88e-10
rs1901640	cg21641816	-0.09	-13.78	1.53e-20
rs898372	cg25172127	0.11	10.13	9.03e-15
rs2489040	cg16342193	-0.06	-7.66	1.57e-10
rs12258145	cg02947450	-0.12	-13.06	1.83e-19
rs2800397	cg14240646	0.24	8.14	2.22e-11
rs2780673	cg14240646	0.24	8.14	2.22e-11
rs10900170	cg03955764	-0.12	-11.51	4.95e-17
rs1549798	cg23339629	0.08	9.61	6.82e-14
rs1549800	cg23339629	0.08	9.61	6.82e-14
rs1549801	cg23339629	0.08	9.61	6.82e-14
rs4748019	cg14458563	0.15	9.33	2.04e-13
rs76394459	cg11519256	0.03	9.6	6.92e-14
rs10883513	cg16342193	-0.06	-7.63	1.74e-10
rs2251968	cg25172127	0.11	9.06	5.91e-13
rs10491016	cg07899896	0.17	7.7	1.31e-10
rs2474530	cg18937502	-0.09	-10.01	1.44e-14
rs11010192	cg18937502	-0.09	-10.01	1.44e-14
[truncated: 495,691+ more rows]
